# Supplementary material for: Process Intensification for the Synthesis of 6-Allyl-6-azabicyclo[3.1.0]hex-3-en-2-ol from 1-Allylpyridinium Salt Using a Continuous UV-Light Photoflow Approach
Source: MDPI journal article supplement (doi:10.3390/mps2030067), 2019-08-05
Supplement: s1 [file s1]

# Process intensification for the synthesis of 6-allyl-6-azabicyclo[3.1.0]hex-3-en-2-ol from 1-allylpyridinium salt using a continuous UV-light photoflow approach

Milene A. G. Fortunato<sup>1</sup>, Chi-Phong Ly,<sup>1,2</sup> Filipa Siopa<sup>1,\*</sup> and Carlos A. M. Afonso<sup>1,\*</sup>

1 Research Institute for Medicines (iMed.Ulisboa), Faculty of Pharmacy, Universidade de Lisboa, Av. Prof. Gama Pinto, 1649-003 Lisboa, Portugal.

2 Sorbonne Université, Faculté des Sciences et Ingénierie, CNRS, Institut Parisien de Chimie Moléculaire, IPCM, 4 place Jussieu, 75005 Paris, France.

\* Correspondence: filipasiopa@ff.ulisboa.pt; carlosafonso@ff.ulisboa.pt

## Supporting Information

### Table of Contents

|                                                                                                                                                                                                                                                                                                                                                                                                                                                  |   |
|--------------------------------------------------------------------------------------------------------------------------------------------------------------------------------------------------------------------------------------------------------------------------------------------------------------------------------------------------------------------------------------------------------------------------------------------------|---|
| Pictures of home-made UV reactor and quartz tubes reactor used for this study .....                                                                                                                                                                                                                                                                                                                                                              | 4 |
| <b>Figure S1:</b> Home-made UV reactor containing 24 PURITEC HNS Germicidal lamps Ref. HNS 8W G5 G5 (8W at 254 nm) with 1,44 m length.; A) Top view of the reactor, 3 lamps assembled in series [8 x 3 = 24 lamps]; B) Exterior view of the home-made UV reactor, with approximately 95 cm of irradiation zone; C) Interior view of half of the home-made UV reactor, is shown 4 blocks of lamps, in each one is shown 3 lamps in series . ..... | 4 |
| <b>Figure S2:</b> Quartz tubes' support for the home-made UV reactor B) Detailed view: Ring to attach the quartz tubes; C) Home-made continuous-flow parallel tube quartz reactor (PQT6): [12 tubes: 95 cm under irradiation (l) x 0.6 cm (d)] inside the home-made UV reactor (top view); D) Support with 3 tubes attached for batch experiments. ....                                                                                          | 5 |
| .....                                                                                                                                                                                                                                                                                                                                                                                                                                            | 5 |
| <b>Figure S3:</b> Set up of the tubes for batch experiments; A) Quartz tubes' support for the home-made UV reactor with 3 tubes attached; B) Batch system inside the home-made UV reactor; C) Top view under irradiation.....                                                                                                                                                                                                                    | 5 |
| <b>Figure S4:</b> Home-made continuous-flow parallel tube quartz reactor (PQT6) [12 tubes: 95 cm (l) x 0.6 cm (d)] A) Before UV irradiation, B) Top view of the PQT6 inside the home-made UV reactor, C) Top view of the PQT6 inside the home-made UV reactor under irradiation.....                                                                                                                                                             | 6 |
| <b>Figure S5:</b> Home-made continuous-flow parallel tube quartz reactor (PQT6), [12 tubes: 95 cm (l) x 0.6 cm (d)] A) Top view before UV irradiation, B) top-view under irradiation; C) top-view after irradiation.....                                                                                                                                                                                                                         | 6 |
| <b>Figure S6:</b> Equipment used for photochemical transformation in continuous flow .....                                                                                                                                                                                                                                                                                                                                                       | 7 |
| Troubleshooting.....                                                                                                                                                                                                                                                                                                                                                                                                                             | 7 |
| <b>Figure S7:</b> PQT6 after irradiation with yellow residue on the walls. ....                                                                                                                                                                                                                                                                                                                                                                  | 7 |
| Batch experiments results.....                                                                                                                                                                                                                                                                                                                                                                                                                   | 8 |
| Batch experiments with different internal diameters (QT2, QT4, QT6).....                                                                                                                                                                                                                                                                                                                                                                         | 8 |

|                                                                                                                                                                                                                                                                           |    |
|---------------------------------------------------------------------------------------------------------------------------------------------------------------------------------------------------------------------------------------------------------------------------|----|
| <b>Table S1:</b> Results of the batch photochemical transformation of allyl pyridinium salt, Conc. <b>60 mM</b> , using QT2: [95 cm under irradiation ( <i>l</i> ) × 0.2 cm ( <i>d</i> )]. (The results in green are also presented in Table 1 of the manuscript).....    | 8  |
| <b>Figure S8:</b> <sup>1</sup> H NMR spectra of the batch photochemical transformation of allyl pyridinium salt, Conc. <b>60 mM</b> , using a QT2, with <b>2 hours</b> of irradiation time.....                                                                           | 9  |
| <b>Table S2:</b> Results of the batch photochemical transformation of allyl pyridinium salt, Conc. <b>60 mM</b> , using a QT4: [95 cm under irradiation ( <i>l</i> ) × 0.4 cm ( <i>d</i> )]. (The results in green are also presented in Table 1 of the manuscript) ..... | 10 |
| <b>Figure S9:</b> <sup>1</sup> H NMR spectra of the batch photochemical transformation of allyl pyridinium salt, Conc. <b>60 mM</b> , using a QT4, with <b>4 hours</b> of irradiation time.....                                                                           | 11 |
| <b>Figure S10:</b> <sup>1</sup> H NMR spectra of the batch photochemical transformation of allyl pyridinium salt, Conc. <b>60 mM</b> , using a QT6, with <b>4 hours</b> of irradiation time.....                                                                          | 13 |
| Batch studies different concentrations on the QT6 .....                                                                                                                                                                                                                   | 14 |
| <b>Table S4:</b> Results of the batch photochemical transformation of allyl pyridinium salt, Conc. <b>20 mM</b> , using a QT6. (The results in green are also presented in Table 1 of the manuscript) .....                                                               | 14 |
| <b>Figure S11:</b> <sup>1</sup> H NMR spectra of the batch photochemical transformation of allyl pyridinium salt, Conc. <b>20 mM</b> , using a QT6, with <b>1 hour</b> of irradiation time.....                                                                           | 15 |
| <b>Table S5:</b> Results of the batch photochemical transformation of allyl pyridinium salt, Conc. <b>40 mM</b> , using a QT6. (The results in green are also presented in Table 1 of the manuscript) .....                                                               | 16 |
| <b>Figure S12:</b> <sup>1</sup> H NMR spectra of the batch photochemical transformation of allyl pyridinium salt, Conc. <b>40 mM</b> , using a QT6, with <b>6 hours</b> of irradiation time. ....                                                                         | 17 |
| <b>Table S6:</b> Results of the batch photochemical transformation of allyl pyridinium salt, Conc. <b>60 mM</b> , using a QT6 .....                                                                                                                                       | 18 |
| <b>Figure S13:</b> <sup>1</sup> H NMR spectra of the batch photochemical transformation of allyl pyridinium salt, Conc. <b>60 mM</b> , using a QT6, with <b>8 hours</b> of irradiation time. ....                                                                         | 19 |
| <b>Figure S14:</b> <sup>1</sup> H NMR spectra of the batch photochemical transformation of allyl pyridinium salt, Conc. <b>80 mM</b> , using a QT6, with <b>8 hours</b> of irradiation time. ....                                                                         | 21 |
| <b>Figure S15:</b> Comparison of the photoreaction of the allyl pyridinium salt, at Conc. 20, 40, 60, 80 mM using a QT6 [95 cm ( <i>l</i> ) × 0.6 cm ( <i>d</i> )]: A) Conversion (%) and B) Productivity (mg/h).....                                                     | 22 |
| Optimization of photochemical transformation of 1a to 2a under continuous-flow conditions .                                                                                                                                                                               | 23 |
| <b>Figure S16:</b> <sup>1</sup> H NMR spectra of photochemical transformation of 1a to 2a under continuous-flow conditions [Flow rate: 0.35 mL/min; rpm: 8.75; Residence time: 1.3 h; Conversion: 59%] on the PTQ6 (Table 2, Entry 1). ....                               | 23 |
| <b>Figure S17:</b> <sup>1</sup> H NMR spectra of photochemical transformation of 1a to 2a under continuous-flow conditions [Flow rate: 0.21 mL/min; rpm: 5; Residence time: 2.3 h; Conversion: 75%] on the PTQ6 (Table 2, Entry 2). ....                                  | 24 |
| <b>Figure S18:</b> <sup>1</sup> H NMR spectra of photochemical transformation of 1a to 2a under continuous-flow conditions [Flow rate: 0.14 mL/min; rpm: 3.5; Residence time: 3.3 h; Conversion: 93%] on the PTQ6 (Table 2, Entry 3). ....                                | 25 |

|                                                                                                                                                                                                                                                        |    |
|--------------------------------------------------------------------------------------------------------------------------------------------------------------------------------------------------------------------------------------------------------|----|
| Photochemical transformation of 1a to 2a under continuous-flow conditions.....                                                                                                                                                                         | 25 |
| <b>Table S8:</b> Photochemical transformation of 1a to 2a under continuous-flow conditions <sup>1</sup> .....                                                                                                                                          | 25 |
| <b>Figure S20:</b> Overview of combined <sup>1</sup> H NMR spectra of photochemical transformation of 1a to 2a under continuous-flow conditions [Flow rate: 0.12 mL/min; rpm: 3; Residence time: 4h] on the PTQ6 (Table S8, entries 2-14).....         | 26 |
| <b>Figure S21:</b> <sup>1</sup> H NMR spectra of photochemical transformation of 1a to 2a under continuous-flow conditions [Flow rate: 0.12 mL/min; rpm: 3; Residence time: 4h; Conversion: 92%] on the PTQ6 (Table 3 of the manuscript, Entry 2)..... | 28 |
| <b>Figure S22:</b> <sup>1</sup> H NMR spectra of photochemical transformation of 1a to 2a under continuous-flow conditions [Flow rate: 0.12 mL/min; rpm: 3; Residence time: 4h; Conversion: 83%] on the PTQ6 (Table 3 of the manuscript, Entry 2)..... | 28 |
| <b>Figure S23:</b> <sup>1</sup> H NMR spectra of photochemical transformation of 1a to 2a under continuous-flow conditions [Flow rate: 0.12 mL/min; rpm: 3; Residence time: 4h; Conversion: 66%] on the PTQ6 (Table 3 of the manuscript, Entry 4)..... | 29 |
| <b>Figure S24:</b> <sup>1</sup> H NMR spectra of photochemical transformation of 1a to 2a under continuous-flow conditions [Flow rate: 0.12 mL/min; rpm: 3; Residence time: 4h; Conversion: 41%] on the PTQ6 (Table 3 of the manuscript, Entry 5)..... | 29 |
| <sup>1</sup> H NMR spectra.....                                                                                                                                                                                                                        | 30 |
| <b>Figure S26:</b> <sup>1</sup> H NMR spectra of 1-allylpyridinium bromide, in accordance with literature [7].....                                                                                                                                     | 30 |
| <b>Figure S27:</b> <sup>1</sup> H NMR spectra of 6-allyl-6-azabicyclo[3.1.0]hex-3-en-2-ol, in accordance with literature [7].....                                                                                                                      | 30 |

## Pictures of home-made UV reactor and quartz tubes reactor used for this study

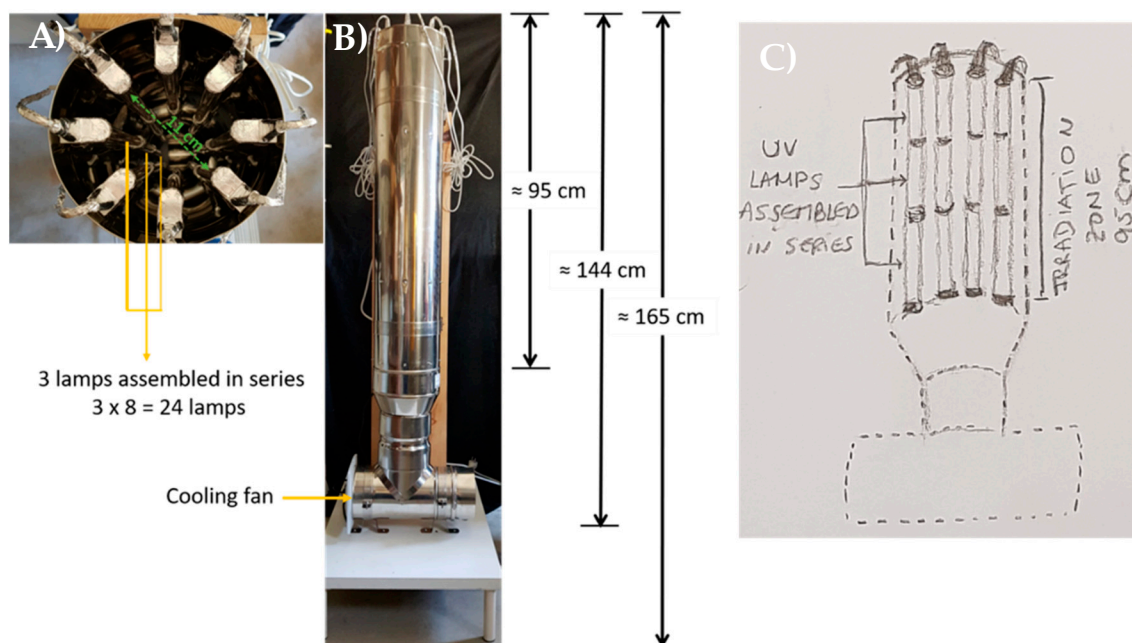

**Figure S1:** Home-made UV reactor containing 24 PURITEC HNS Germicidal lamps Ref. HNS 8W G5 G5 (8W at 254 nm) with 1,44 m length.; A) Top view of the reactor, 3 lamps assembled in series [8 x 3 = 24 lamps); B) Exterior view of the home-made UV reactor, with approximately 95 cm of irradiation zone; C) Interior view of half of the home-made UV reactor, is shown 4 blocks of lamps, in each one is shown 3 lamps in series .

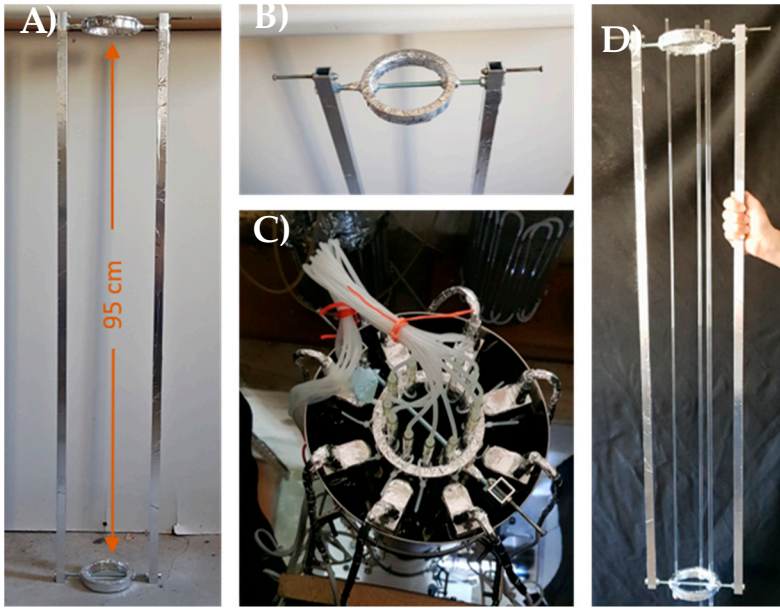

**Figure S2:** Quartz tubes' support for the home-made UV reactor B) Detailed view: Ring to attach the quartz tubes; C) Home-made continuous-flow parallel tube quartz reactor (PQT6): [12 tubes: 95 cm under irradiation (l)  $\times$  0.6 cm (d)] inside the home-made UV reactor (top view); D) Support with 3 tubes attached for batch experiments.

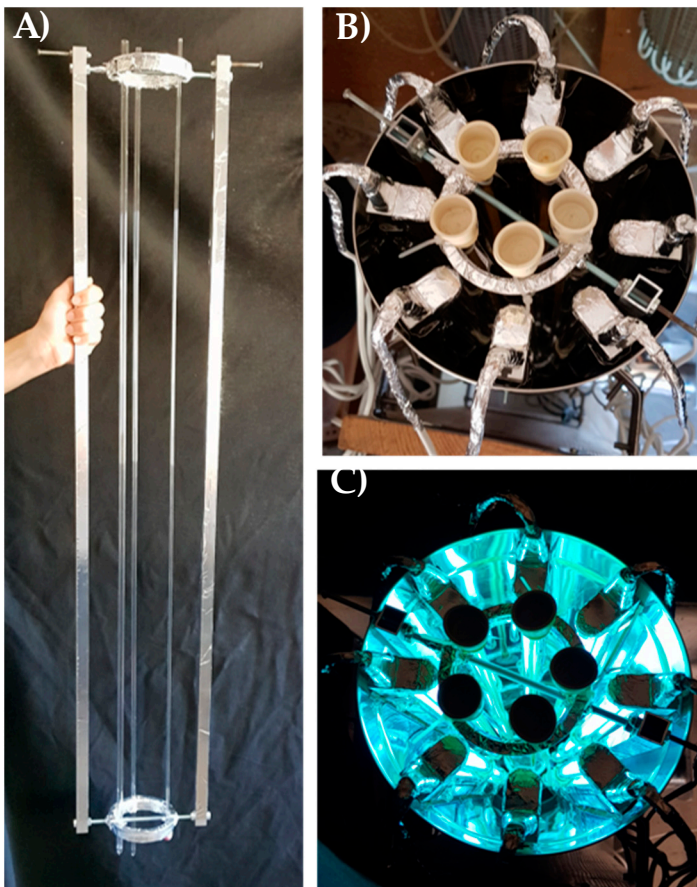

**Figure S3:** Set up of the tubes for batch experiments; A) Quartz tubes' support for the home-made UV reactor with 3 tubes attached; B) Batch system inside the home-made UV reactor; C) Top view under irradiation.



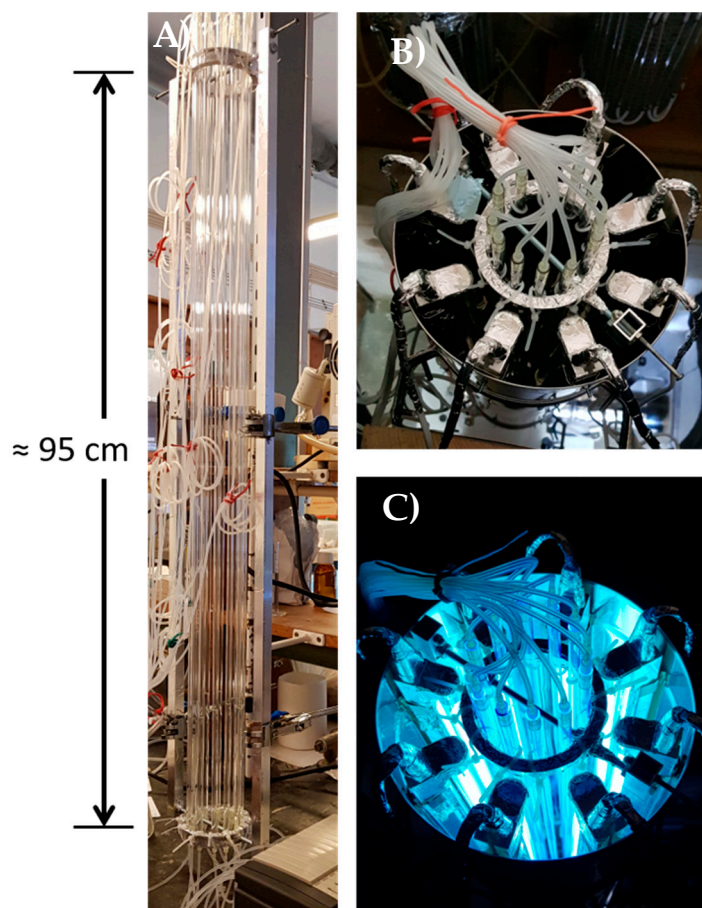

**Figure S4:** Home-made continuous-flow parallel tube quartz reactor (PQT6) [12 tubes: 95 cm (l)  $\times$  0.6 cm (d)] A) Before UV irradiation, B) Top view of the PQT6 inside the home-made UV reactor, C) Top view of the PQT6 inside the home-made UV reactor under irradiation.

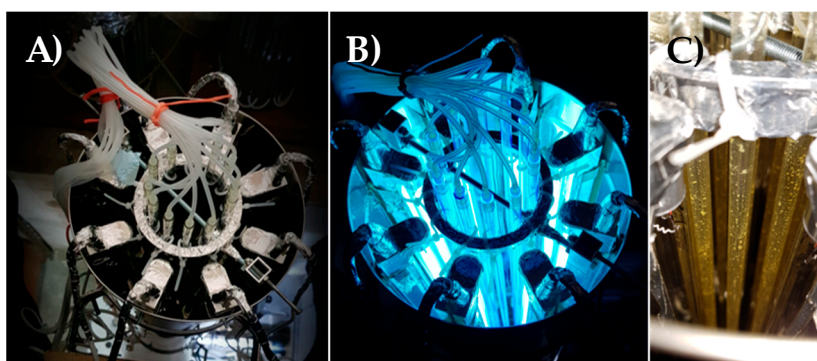

**Figure S5:** Home-made continuous-flow parallel tube quartz reactor (PQT6), [12 tubes: 95 cm (l)  $\times$  0.6 cm (d)] A) Top view before UV irradiation, B) top-view under irradiation; C) top-view after irradiation.

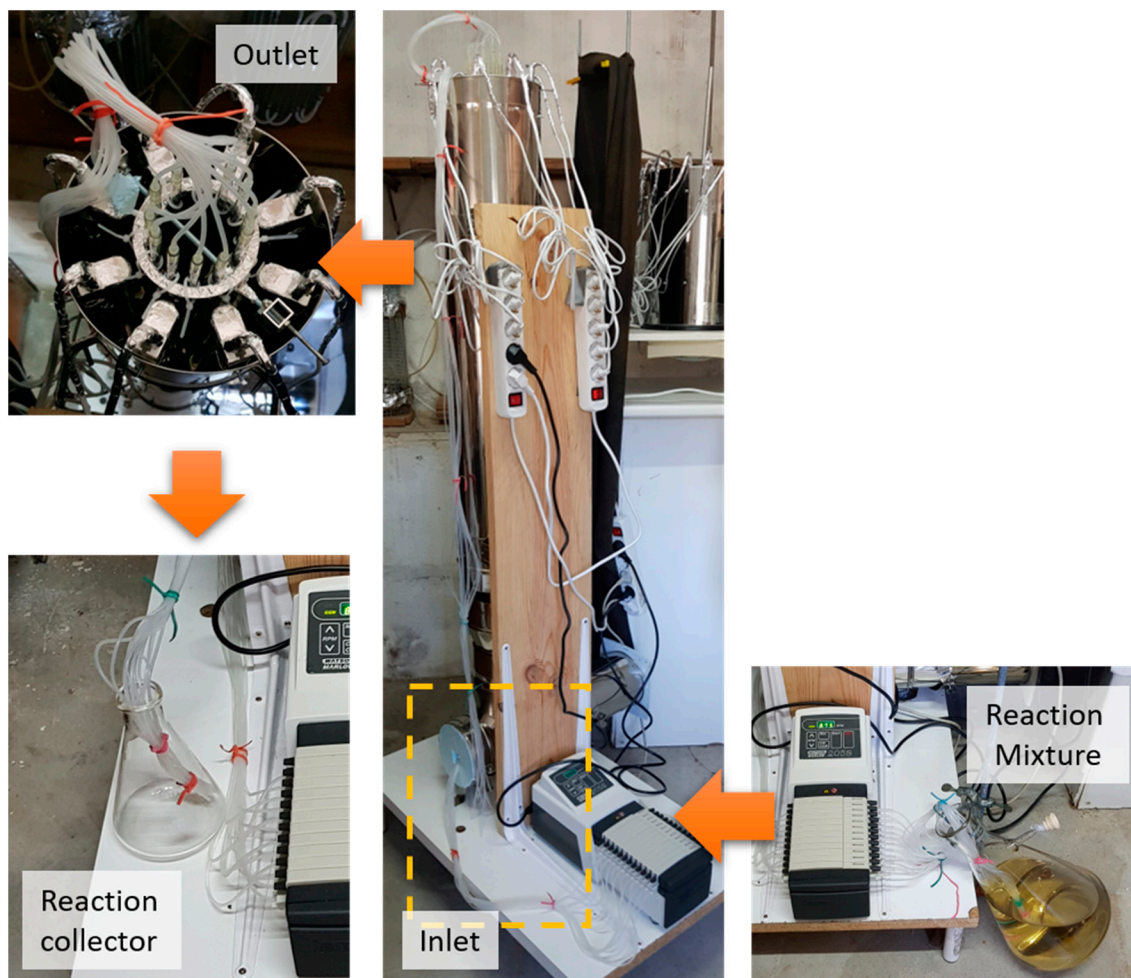

Figure S6: Equipment used for photochemical transformation in continuous flow

## Troubleshooting

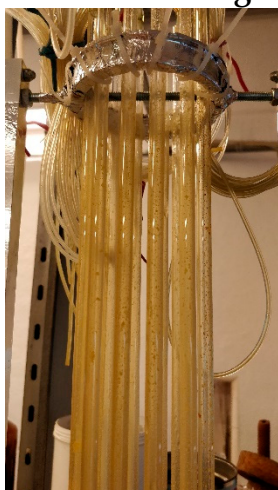

Figure S7: PQT6 after irradiation with yellow residue on the walls.

In all the photochemical reactions a yellow residue was gradually formed on the reactor walls. The residue was removed by disassembling the PQT6 and washing the quartz tubes using water pressure and a tube cleaning brush.

## Batch experiments results

### Batch experiments with different internal diameters (QT2, QT4, QT6)

**Table S1:** Results of the batch photochemical transformation of allyl pyridinium salt, Conc. 60 mM, using QT2: [95 cm under irradiation (*l*) × 0.2 cm (*d*)]. (The results in green are also presented in Table 1 of the manuscript)

| Time (h) | Conv.(%) <sup>[1]</sup> | Conv.(%) <sup>[2]</sup> | Avg. Conv. (%) <sup>[3]</sup> | Product Mass (g) <sup>[4]</sup> | Productivity g <sup>[4]</sup> L <sup>-1</sup> h <sup>-1</sup> <sup>[5]</sup> | Productivity g <sup>[4]</sup> m <sup>-2</sup> h <sup>-1</sup> <sup>[6]</sup> | Productivity mg h <sup>-1</sup> |
|----------|-------------------------|-------------------------|-------------------------------|---------------------------------|------------------------------------------------------------------------------|------------------------------------------------------------------------------|---------------------------------|
| 1        | 80.97                   | 81.63                   | 81.30                         | 0.020                           | 6.69                                                                         | 3.35                                                                         | 19.97                           |
| 2        | 100                     | 100                     | 100                           | 0.0246                          | 4.12                                                                         | 2.06                                                                         | 12.28                           |
| 3        | 100                     | 100                     | 100                           | 0.0246                          | 2.74                                                                         | 1.37                                                                         | 8.19                            |
| 4        | 100                     | 100                     | 100                           | 0.0246                          | 2.06                                                                         | 1.03                                                                         | 6.14                            |
| 5        | 100                     | 100                     | 100                           | 0.0246                          | 1.65                                                                         | 0.82                                                                         | 4.91                            |

<sup>[1]</sup> <sup>1</sup>H NMR conversion obtained by the integration of the aziridine peak at 6.30 ppm to 1H and the pyridine peak at 8.81 ppm. Conversion =

$$\frac{\text{Area of Aziridine signal (6.30 ppm)}}{[\text{Area of Pyridine signal (8.81 ppm)}/2 + \text{Area of Aziridine signals (6.30 ppm)}]} \times 100$$

<sup>[2]</sup> <sup>1</sup>H NMR conversion obtained by the integration of the aziridine peak at 6.30 ppm to 1H and the pyridine peak at 8.05 ppm. Conversion =

$$\frac{\text{Area of Aziridine signal (6.30 ppm)}}{[\text{Area of Pyridine signal (8.05 ppm)}/2 + \text{Area of Aziridine signals (6.30 ppm)}]} \times 100$$

<sup>[3]</sup> Average of the Conversions

$$\text{[4] Product mass (g)} = \frac{[\text{Avg. Conversion (\%)} \times \text{MM Aziridine (138.17 g/mol)} \times \text{n mol A1zirdine (0.000179 mol)}]}{100}$$

$$\text{[5] Irradiation Volume} - \pi \times r^2 \times h = \pi \times 0.1^2 \times 95 = 2.99 \text{ cm}^3 = 0.00299 \text{ L}$$

$$\text{[6] Area} = L \times 2\pi r = 0.95 \times 2\pi \times 0.001 = 0.006 \text{ m}^2$$



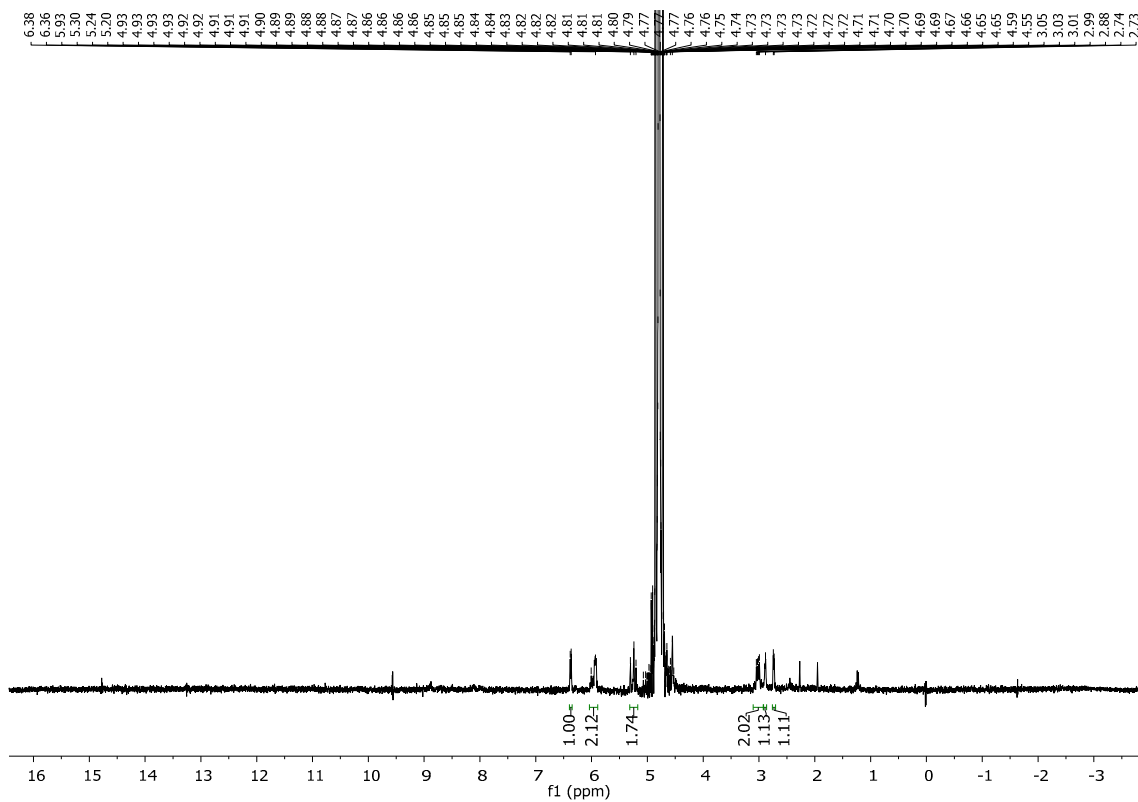

**Figure S8:** <sup>1</sup>H NMR spectra of the batch photochemical transformation of allyl pyridinium salt, Conc. 60 mM, using a QT2, with 2 hours of irradiation time.

**Table S2:** Results of the batch photochemical transformation of allyl pyridinium salt, Conc. **60 mM**, using a QT4: [95 cm under irradiation (*l*) × 0.4 cm (*d*)]. (The results in green are also presented in Table 1 of the manuscript)

| <b>Time (h)</b> | <b>Conv.(%)<sup>[1]</sup></b> | <b>Conv.(%)<sup>[2]</sup></b> | <b>Avg. Conv. (%)<sup>[3]</sup></b> | <b>Product Mass (g)<sup>[4]</sup></b> | <b>Productivity g<sup>[4]</sup> L<sup>-1</sup> h<sup>-1</sup> <sup>[5]</sup></b> | <b>Productivity g<sup>[4]</sup> m<sup>-2</sup> h<sup>-1</sup> <sup>[6]</sup></b> | <b>Productivity mg h<sup>-1</sup></b> |
|-----------------|-------------------------------|-------------------------------|-------------------------------------|---------------------------------------|----------------------------------------------------------------------------------|----------------------------------------------------------------------------------|---------------------------------------|
| 2               | 80.97                         | 79.37                         | 80.17                               | 0.079                                 | 3.30                                                                             | 3.30                                                                             | 39.38                                 |
| 4               | 90.50                         | 87.34                         | 88.92                               | 0.087                                 | 1.83                                                                             | 1.83                                                                             | 21.84                                 |
| 5               | 90.50                         | 88.89                         | 89.69                               | 0.088                                 | 1.48                                                                             | 1.48                                                                             | 17.63                                 |
| 6               | 86.96                         | 84.75                         | 85.85                               | 0.084                                 | 1.18                                                                             | 1.18                                                                             | 14.06                                 |
| 7               | 92.59                         | 91.32                         | 91.96                               | 0.090                                 | 1.08                                                                             | 1.08                                                                             | 12.91                                 |
| 8               | 92.17                         | 92.17                         | 92.17                               | 0.091                                 | 0.95                                                                             | 0.95                                                                             | 11.32                                 |

<sup>[1]</sup> <sup>1</sup>H NMR conversion obtained by the integration of the aziridine peak at 6.30 ppm to 1H and the pyridine peak at 8.81 ppm. *Conversion* =  $\frac{\text{Area of Aziridine signal (6.30 ppm)}}{[\text{Area of Pyridine signal (8.81 ppm)}/2 + \text{Area of Aziridine signals (6.30 ppm)}]} \times 100$

<sup>[2]</sup> <sup>1</sup>H NMR conversion obtained by the integration of the aziridine peak at 6.30 ppm to 1H and the pyridine peak at 8.05 ppm. *Conversion* =  $\frac{\text{Area of Aziridine signal (6.30 ppm)}}{[\text{Area of Pyridine signal (8.05 ppm)}/2 + \text{Area of Aziridine signals (6.30 ppm)}]} \times 100$

<sup>[3]</sup> Average of the Conversions

<sup>[4]</sup> *Product mass (g)* =  $\frac{[\text{Avg. Conversion (\%)} \times \text{MM Aziridine (137.18g/mol)} \times \text{n mol Aziridine (0.000716mol)}]}{100}$

<sup>[5]</sup> Irradiation Volume-  $\pi \times r^2 \times h = \pi \times 0.2^2 \times 95 = 11.94 \text{ cm}^3 = 0.01194\text{L}$

<sup>[6]</sup> Area =  $L \times 2\pi r = 0.95 \times 2\pi \times 0.002 = 0.01194 \text{ m}^2$

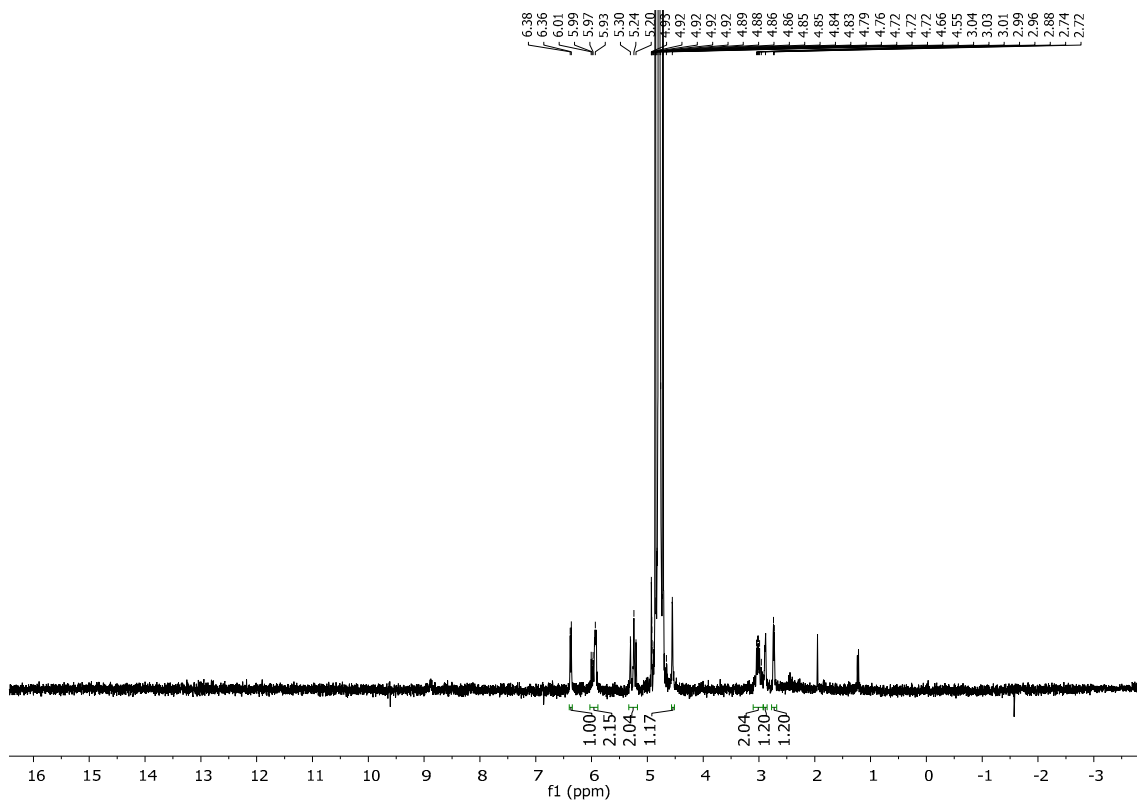

**Figure S9:**  $^1\text{H}$  NMR spectra of the batch photochemical transformation of allyl pyridinium salt, Conc. 60 mM, using a QT4, with 4 hours of irradiation time.

**Table S3:** Results of the batch photochemical transformation of allyl pyridinium salt, Conc. **60 mM**, using a QT6: [95 cm under irradiation (*l*) × 0.6 cm (*d*)]. (The results in green are also presented in Table 1 of the manuscript)

| Time (h) | Conv.(%) <sup>[1]</sup> | Conv.(%) <sup>[2]</sup> | Avg. Conv. (%) <sup>[3]</sup> | Product Mass (g) <sup>[4]</sup> | Productivity g <sup>[4]</sup> L <sup>-1</sup> h <sup>-1</sup> <sup>[5]</sup> | Productivity g <sup>[4]</sup> m <sup>-2</sup> h <sup>-1</sup> <sup>[6]</sup> | Productivity mg h <sup>-1</sup> |
|----------|-------------------------|-------------------------|-------------------------------|---------------------------------|------------------------------------------------------------------------------|------------------------------------------------------------------------------|---------------------------------|
| 2        | 65.36                   | 63.90                   | 64.63                         | 0.14                            | 2.64                                                                         | 3.97                                                                         | 71.04                           |
| 4        | 86.96                   | 84.75                   | 85.85                         | 0.19                            | 1.77                                                                         | 2.65                                                                         | 47.53                           |
| 6        | 94.79                   | 94.34                   | 94.56                         | 0.21                            | 1.30                                                                         | 1.95                                                                         | 35.01                           |
| 8        | 91.74                   | 100                     | 95.87                         | 0.21                            | 0.99                                                                         | 1.48                                                                         | 26.53                           |
| 10       | 93.90                   | 4.34                    | 94.12                         | 0.21                            | 0.77                                                                         | 1.16                                                                         | 20.78                           |

<sup>[1]</sup> <sup>1</sup>H NMR conversion obtained by the integration of the aziridine peak at 6.30 ppm to 1H and the pyridine peak at 8.81 ppm. Conversion =

$$\frac{\text{Area of Aziridine signal (6.30 ppm)}}{[\text{Area of Pyridine signal (8.81 ppm)}/2 + \text{Area of Aziridine signals (6.30 ppm)}]} \times 100$$

<sup>[2]</sup> <sup>1</sup>H NMR conversion obtained by the integration of the aziridine peak at 6.30 ppm to 1H and the pyridine peak at 8.05 ppm. Conversion =

$$\frac{\text{Area of Aziridine signal (6.30 ppm)}}{[\text{Area of Pyridine signal (8.05 ppm)}/2 + \text{Area of Aziridine signals (6.30 ppm)}]} \times 100$$

<sup>[3]</sup> Average of the Conversions

$$\text{Product mass (g)} = \frac{[\text{Avg. Conversion (\%)} \times \text{MM Aziridine (138.17 g/mol)} \times \text{n mol Aziridine (0.00161 mol)}]}{100}$$

$$\text{Irradiation Volume} = \pi \times r^2 \times h = \pi \times 0.3^2 \times 95 = 26.86 \text{ cm}^3 = 0.0269 \text{ L}$$

$$\text{Area} = L \times 2\pi r = 0.95 \times 2\pi \times 0.003 = 0.0179 \text{ m}^2$$

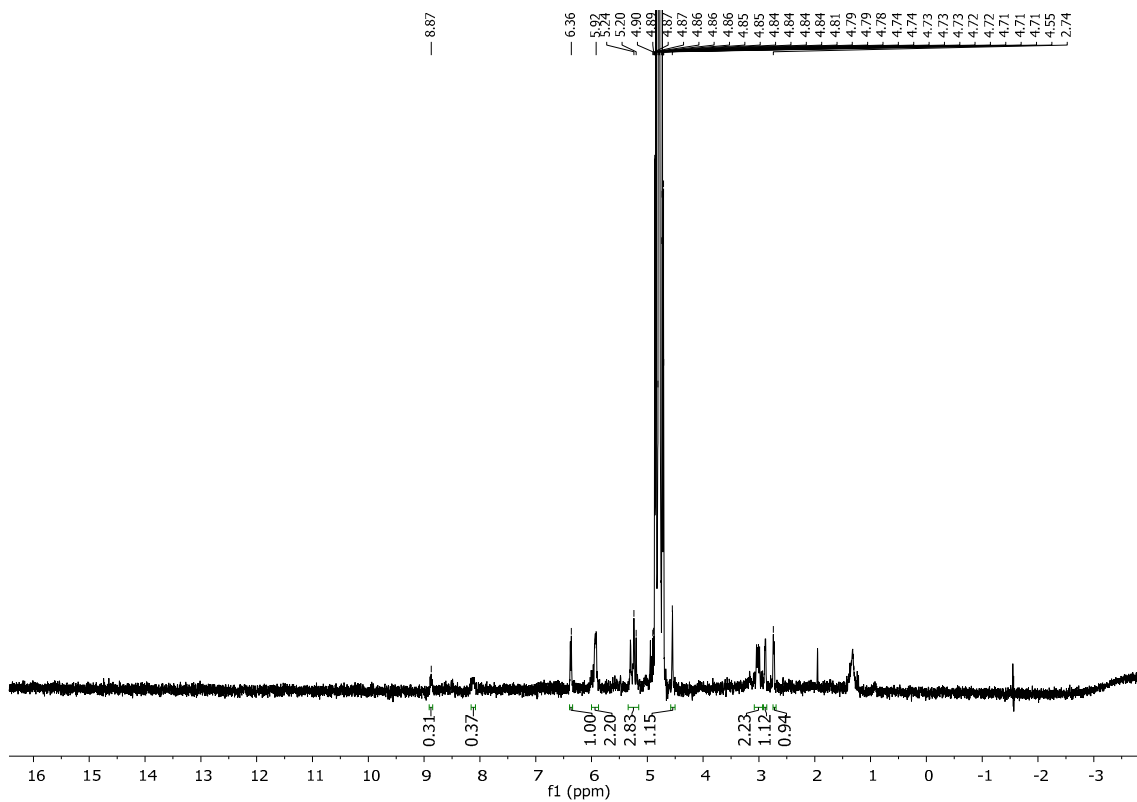

**Figure S10:**  $^1\text{H}$  NMR spectra of the batch photochemical transformation of allyl pyridinium salt, Conc. 60 mM, using a QT6, with 4 hours of irradiation time.



## Batch studies different concentrations on the QT6

**Table S4:** Results of the batch photochemical transformation of allyl pyridinium salt, Conc. **20 mM**, using a QT6. (The results in green are also presented in Table 1 of the manuscript)

| Time (h) | Conv.(%) <sup>[1]</sup> | Conv.(%) <sup>[2]</sup> | Avg. Conv. (%) <sup>[3]</sup> | Product Mass (g) <sup>[4]</sup> | Productivity g <sup>[4]</sup> L <sup>-1</sup> h <sup>-1</sup> <sup>[5]</sup> | Productivity g <sup>[4]</sup> m <sup>-2</sup> h <sup>-1</sup> <sup>[6]</sup> | Productivity mg h <sup>-1</sup> |
|----------|-------------------------|-------------------------|-------------------------------|---------------------------------|------------------------------------------------------------------------------|------------------------------------------------------------------------------|---------------------------------|
| 1        | 100                     | 100                     | 100                           | 0.074                           | 2.74                                                                         | 4.12                                                                         | 73.69                           |
| 2        | 100                     | 100                     | 100                           | 0.074                           | 1.37                                                                         | 2.06                                                                         | 36.85                           |
| 3        | 100                     | 100                     | 100                           | 0.074                           | 0.91                                                                         | 1.37                                                                         | 24.56                           |
| 4        | 100                     | 100                     | 100                           | 0.074                           | 0.69                                                                         | 1.03                                                                         | 18.42                           |
| 5        | 100                     | 100                     | 100                           | 0.074                           | 0.55                                                                         | 0.82                                                                         | 14.74                           |
| 6        | 100                     | 100                     | 100                           | 0.074                           | 0.46                                                                         | 0.69                                                                         | 12.28                           |
| 7        | 100                     | 100                     | 100                           | 0.074                           | 0.39                                                                         | 0.59                                                                         | 10.53                           |

<sup>[1]</sup> <sup>1</sup>H NMR conversion obtained by the integration of the aziridine peak at 6.30 ppm to 1H and the pyridine peak at 8.81 ppm. *Conversion* =  $\frac{\text{Area of Aziridine signal (6.30 ppm)}}{[\text{Area of Pyridine signal (8.81 ppm)} + 2 \times \text{Area of Aziridine signals (6.30 ppm)}]} \times 100$

<sup>[2]</sup> <sup>1</sup>H NMR conversion obtained by the integration of the aziridine peak at 6.30 ppm to 1H and the pyridine peak at 8.05 ppm. *Conversion* =  $\frac{\text{Area of Aziridine signal (6.30 ppm)}}{[\text{Area of Pyridine signal (8.05 ppm)} + 2 \times \text{Area of Aziridine signals (6.30 ppm)}]} \times 100$

<sup>[3]</sup> Average of the Conversions

<sup>[4]</sup> *Product mass (g)* =  $\frac{[\text{Avg. Conversion (\%)} \times \text{MM Aziridine (138.17 g/mol)} \times \text{n mol Aziridine (0.000537 mol)}]}{100}$

<sup>[5]</sup> Irradiation Volume-  $\pi \times r^2 \times h = \pi \times 0.3^2 \times 95 = 26.86 \text{ cm}^3 = 0.0269 \text{ L}$

<sup>[6]</sup> Area =  $L \times 2\pi r = 0.95 \times 2\pi \times 0.003 = 0.0179 \text{ m}^2$

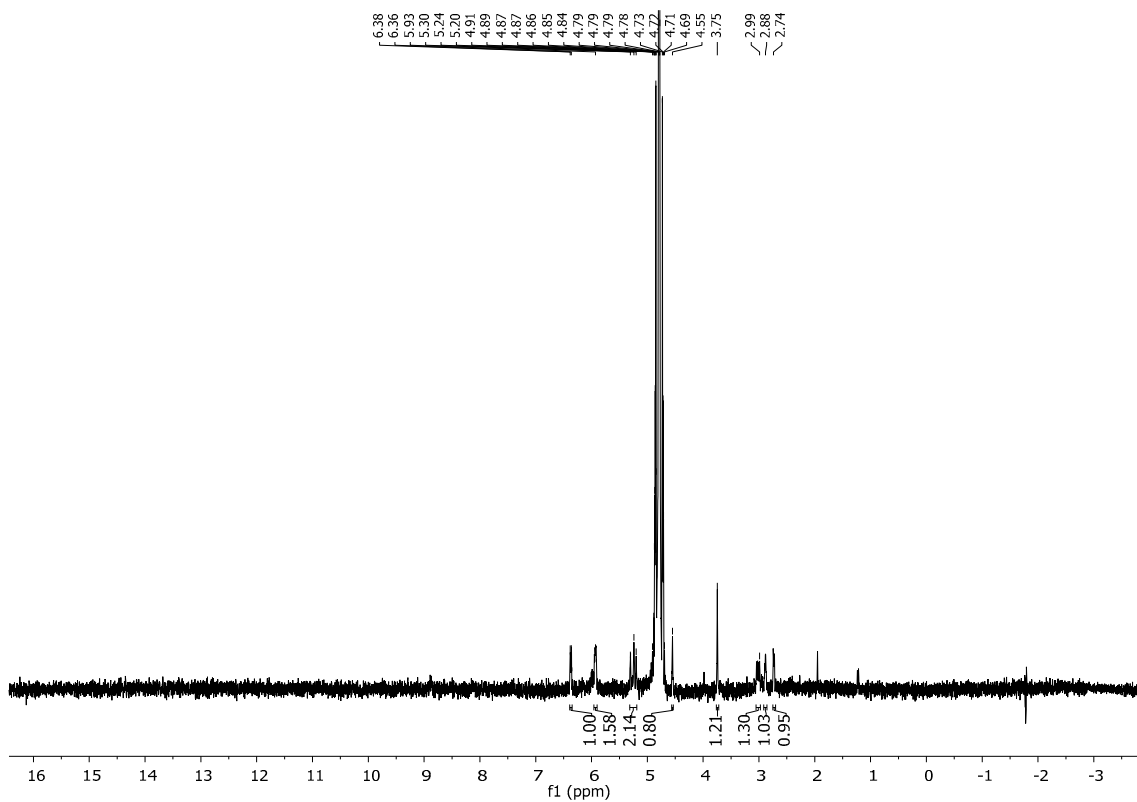

**Figure S11:**  $^1\text{H}$  NMR spectra of the batch photochemical transformation of allyl pyridinium salt, Conc. 20 mM, using a QT6, with 1 hour of irradiation time.

**Table S5:** Results of the batch photochemical transformation of allyl pyridinium salt, Conc. **40 mM**, using a QT6. (The results in green are also presented in Table 1 of the manuscript)

| <b>Time (h)</b> | <b>Conv.(%)<sup>[1]</sup></b> | <b>Conv.(%)<sup>[2]</sup></b> | <b>Avg. Conv. (%)<sup>[3]</sup></b> | <b>Product Mass (g)<sup>[4]</sup></b> | <b>Productivity g<sup>[4]</sup> L<sup>-1</sup> h<sup>-1</sup> <sup>[5]</sup></b> | <b>Productivity g<sup>[4]</sup> m<sup>-2</sup> h<sup>-1</sup> <sup>[6]</sup></b> | <b>Productivity mg h<sup>-1</sup></b> |
|-----------------|-------------------------------|-------------------------------|-------------------------------------|---------------------------------------|----------------------------------------------------------------------------------|----------------------------------------------------------------------------------|---------------------------------------|
| 1               | 60.8                          | 57.3                          | 59.05                               | 0.087                                 | 3.24                                                                             | 4.86                                                                             | 87.03                                 |
| 2               | 78.13                         | 76.34                         | 77.23                               | 0.113                                 | 2.11                                                                             | 3.17                                                                             | 56.74                                 |
| 3               | 83.33                         | 86.21                         | 84.77                               | 0.125                                 | 1.55                                                                             | 2.33                                                                             | 41.76                                 |
| 4               | 86.96                         | 88.50                         | 87.73                               | 0.130                                 | 1.21                                                                             | 1.81                                                                             | 32.43                                 |
| 5               | 93.46                         | 92.59                         | 93.03                               | 0.137                                 | 1.02                                                                             | 1.53                                                                             | 27.41                                 |
| <b>6</b>        | <b>100</b>                    | <b>100</b>                    | <b>100</b>                          | <b>0.7</b>                            | <b>0.915</b>                                                                     | <b>1.37</b>                                                                      | <b>24.56</b>                          |

$$^{[4]} \text{Product mass (g)} = \frac{[\text{Avg. Conversion (\%)} * \text{MM Aziridine (138.17 g/mol)} * \text{n mol Aziridine (0.00107 mol)}]}{100}$$

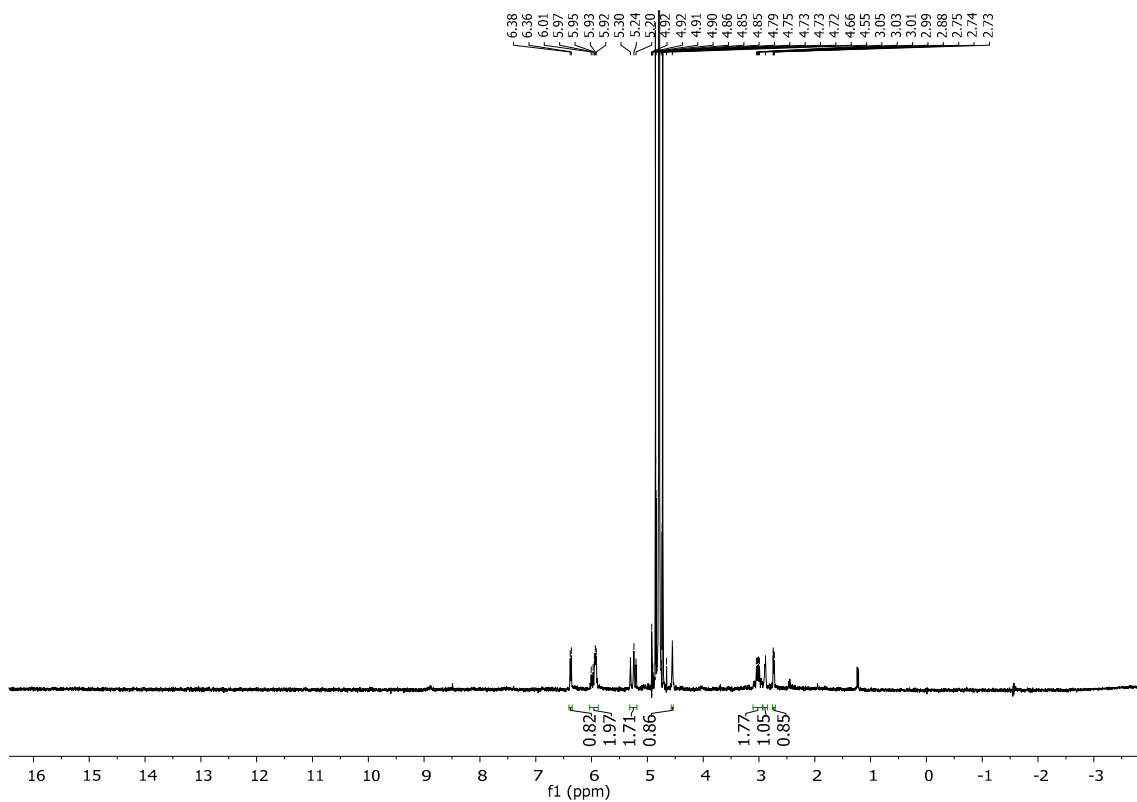

**Figure S12:** <sup>1</sup>H NMR spectra of the batch photochemical transformation of allyl pyridinium salt, Conc. 40 mM, using a QT6, with 6 hours of irradiation time.

**Table S6:** Results of the batch photochemical transformation of allyl pyridinium salt, Conc. **60 mM**, using a QT6

| <b>Time (h)</b> | <b>Conv.(%)<sup>[1]</sup></b> | <b>Conv.(%)<sup>[2]</sup></b> | <b>Avg. Conv. (%)<sup>[3]</sup></b> | <b>Product Mass (g)<sup>[4]</sup></b> | <b>Productivity g<sup>[4]</sup> L<sup>-1</sup> h<sup>-1</sup> <sup>[5]</sup></b> | <b>Productivity g<sup>[4]</sup> m<sup>-2</sup> h<sup>-1</sup> <sup>[6]</sup></b> | <b>Productivity mg h<sup>-1</sup></b> |
|-----------------|-------------------------------|-------------------------------|-------------------------------------|---------------------------------------|----------------------------------------------------------------------------------|----------------------------------------------------------------------------------|---------------------------------------|
| 2               | 61.16                         | 59.70                         | 60.43                               | 0.133                                 | 2.47                                                                             | 3.70                                                                             | 66.33                                 |
| 4               | 78.43                         | 77.52                         | 77.98                               | 0.172                                 | 1.61                                                                             | 2.41                                                                             | 43.11                                 |
| 6               | 86.21                         | 84.75                         | 85.48                               | 0.190                                 | 1.18                                                                             | 1.77                                                                             | 31.69                                 |
| 8               | 87.72                         | 90.09                         | 88.90                               | 0.197                                 | 0.9156                                                                           | 1.37                                                                             | 24.60                                 |

$$^{[4]} \text{Product mass (g)} = \frac{[\text{Avg. Conversion (\%)} \cdot \text{MM Aziridine (138.17 g/mol)} \cdot \text{n mol Aziridine (0.00161 mol)}]}{100}$$



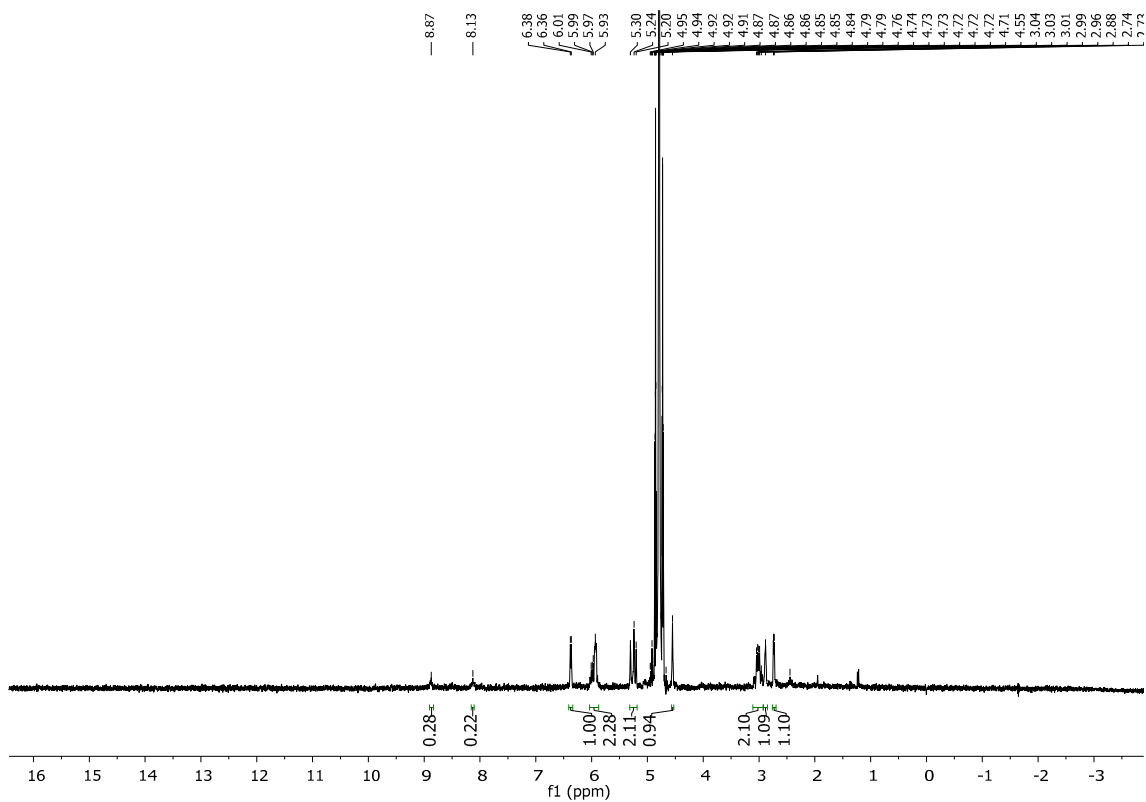

**Figure S13:**  $^1\text{H}$  NMR spectra of the batch photochemical transformation of allyl pyridinium salt, Conc. 60 mM, using a QT6, with 8 hours of irradiation time.

**Table S7:** Results of the batch photochemical transformation of allyl pyridinium salt, Conc. 80 mM, using a QT6. (The results in green are also presented in Table 1 of the manuscript)

| Time (h) | Conv.(%) <sup>[1]</sup> | Conv.(%) <sup>[2]</sup> | Avg. Conv. (%) <sup>[3]</sup> | Product Mass (g) <sup>[4]</sup> | Productivity g <sup>[4]</sup> L <sup>-1</sup> h <sup>-1</sup> <sup>[5]</sup> | Productivity g <sup>[4]</sup> m <sup>-2</sup> h <sup>-1</sup> <sup>[6]</sup> | Productivity mg h <sup>-1</sup> |
|----------|-------------------------|-------------------------|-------------------------------|---------------------------------|------------------------------------------------------------------------------|------------------------------------------------------------------------------|---------------------------------|
| 2        | 52.77                   | 59.70                   | 60.43                         | 0.133                           | 2.47                                                                         | 3.70                                                                         | 76.64                           |
| 4        | 60.98                   | 77.52                   | 77.98                         | 0.172                           | 1.61                                                                         | 2.41                                                                         | 44.22                           |
| 6        | 68.73                   | 67.80                   | 68.26                         | 0.200                           | 1.24                                                                         | 1.87                                                                         | 33.41                           |
| 8        | 78.13                   | 76.34                   | 77.23                         | 0.227                           | 1.06                                                                         | 1.58                                                                         | 28.37                           |

$$^{[4]} \text{Product mass (g)} = \frac{[\text{Avg. Conversion (\%)} * \text{MM Aziridine (138.17 g/mol)} * \text{n mol Aziridine (0.00215 mol)}]}{100}$$

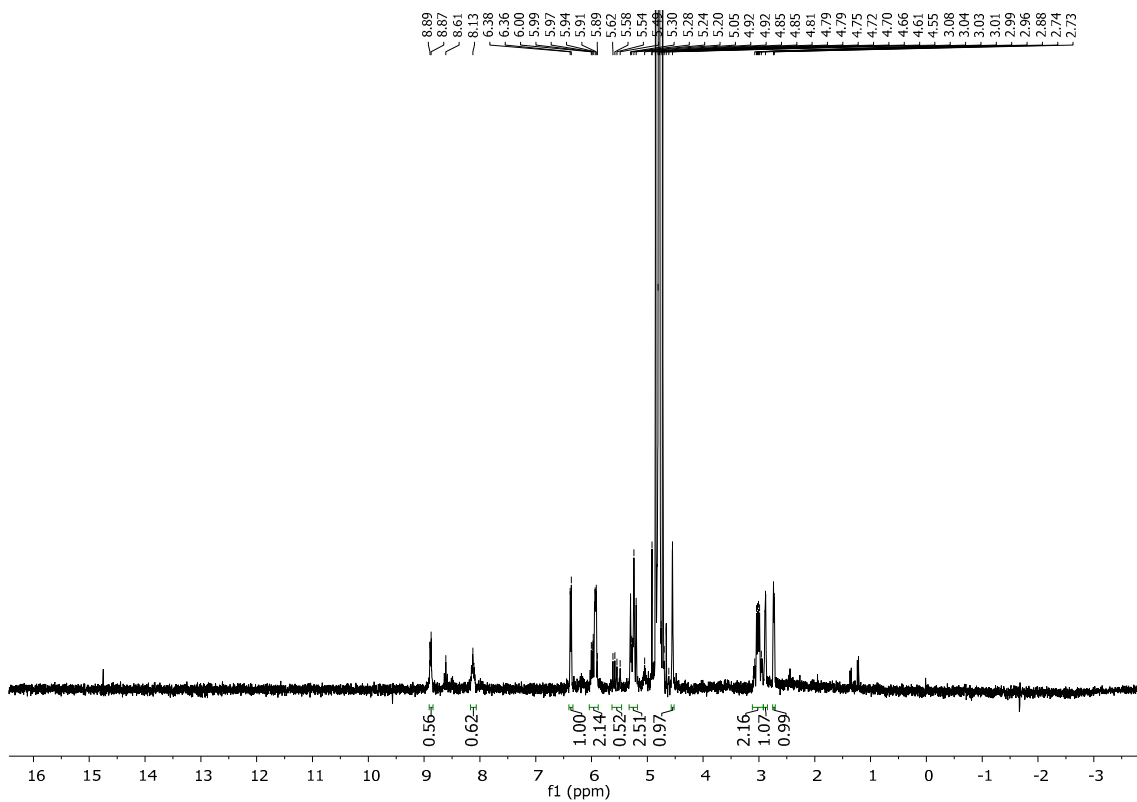

**Figure S14:**  $^1\text{H}$  NMR spectra of the batch photochemical transformation of allyl pyridinium salt, Conc. 80 mM, using a QT6, with 8 hours of irradiation time.

A)

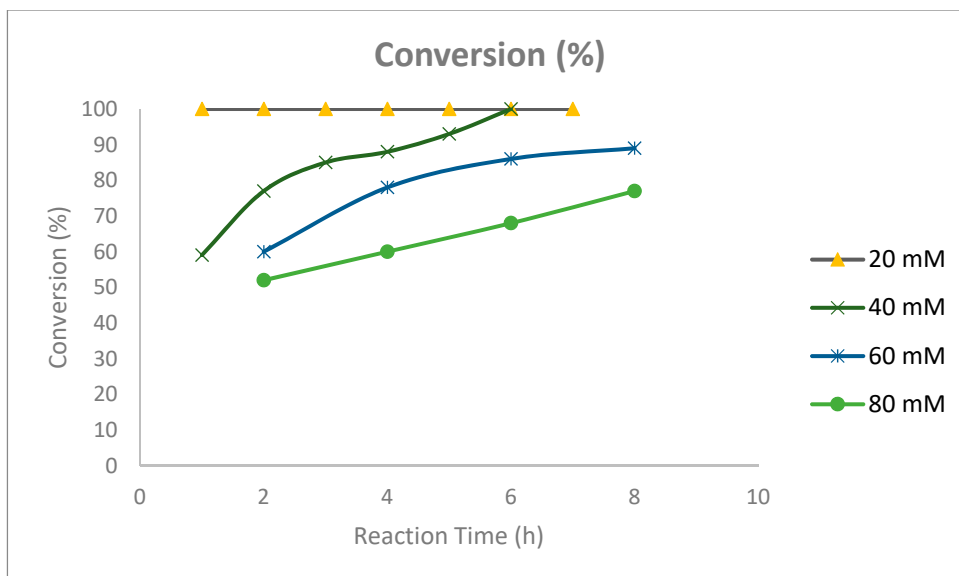

B)

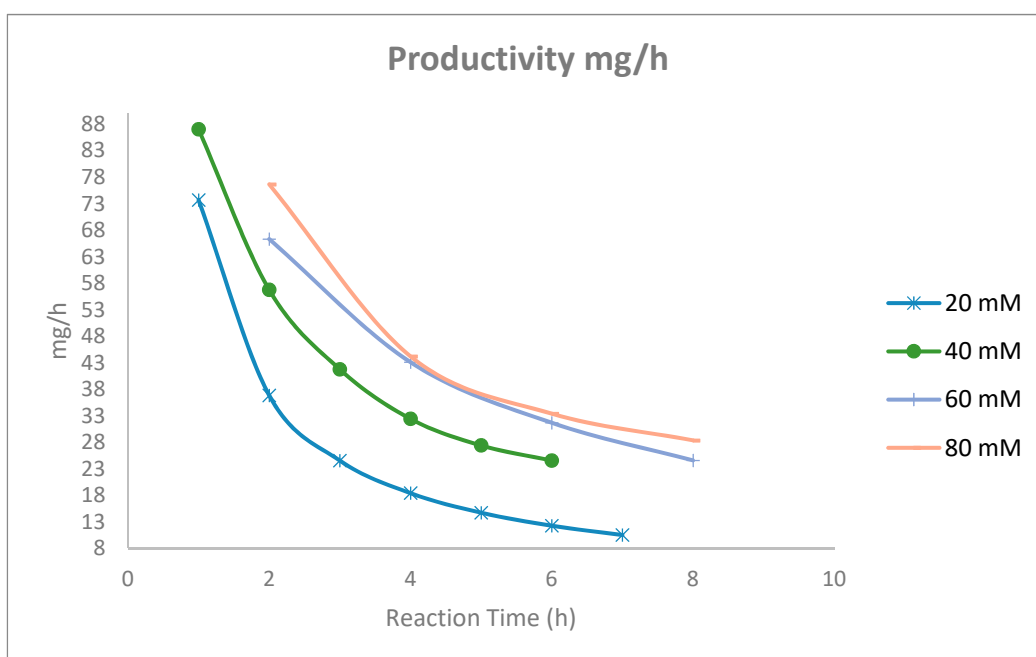

**Figure S15:** Comparison of the photoreaction of the allyl pyridinium salt, at Conc. 20, 40, 60, 80 mM using a QT6 [95 cm (l) × 0.6 cm (d)]: A) Conversion (%) and B) Productivity (mg/h).

## Optimization of photochemical transformation of 1a to 2a under continuous-flow conditions

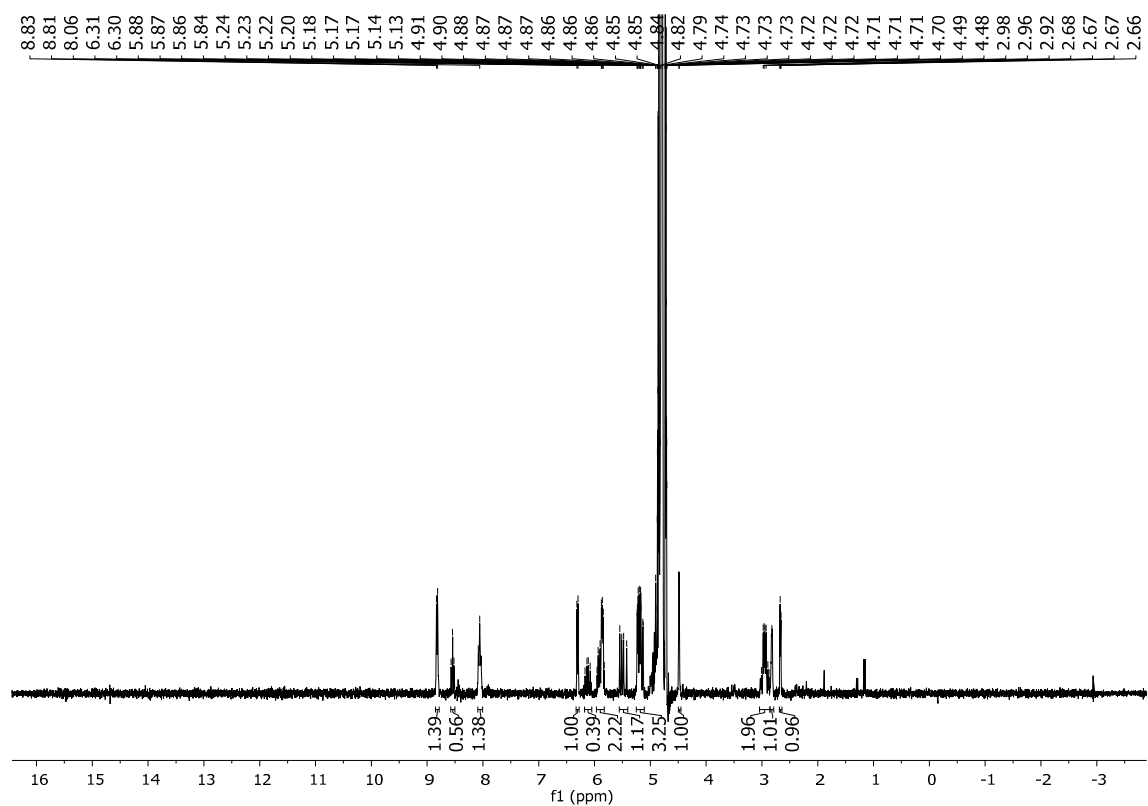

**Figure S16:** <sup>1</sup>H NMR spectra of photochemical transformation of 1a to 2a under continuous-flow conditions [Flow rate: 0.35 mL/min; rpm: 8.75; Residence time: 1.3 h; Conversion: 59%] on the PTQ6 (Table 2, Entry 1).



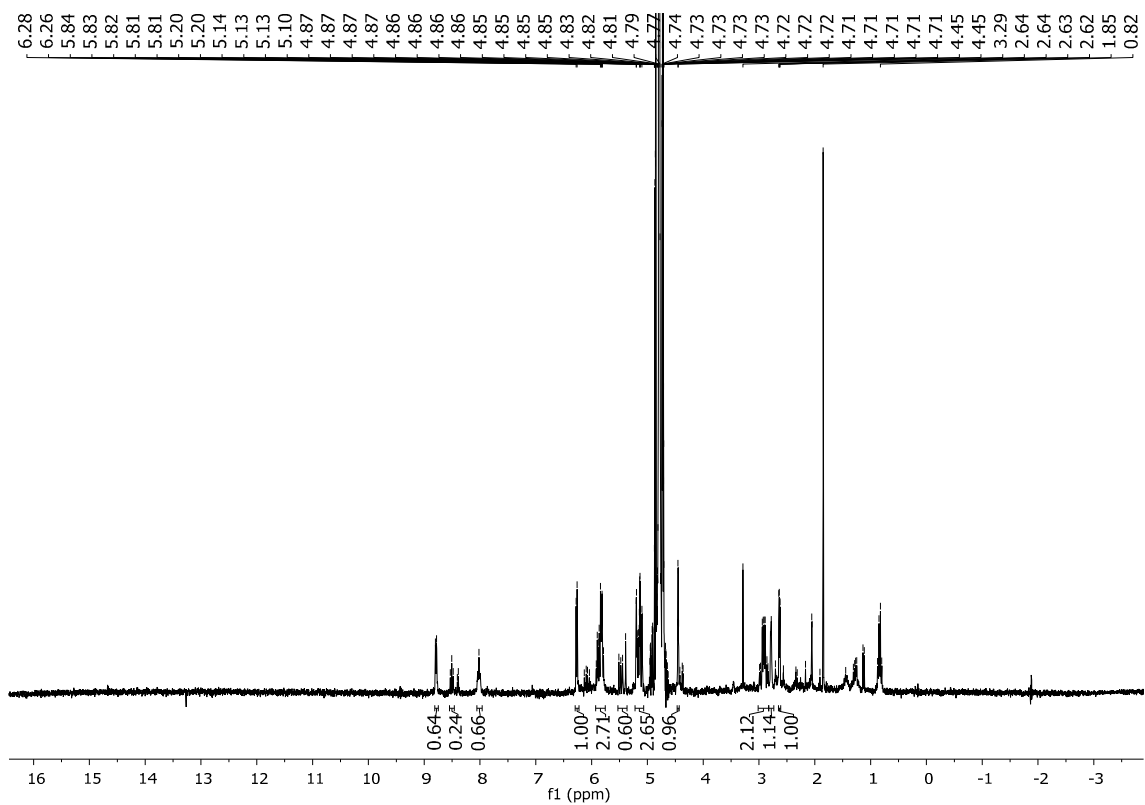

**Figure S17:**  $^1\text{H}$  NMR spectra of photochemical transformation of 1a to 2a under continuous-flow conditions [Flow rate: 0.21 mL/min; rpm: 5; Residence time: 2.3 h; Conversion: 75%] on the PTQ6 (Table 2, Entry 2).

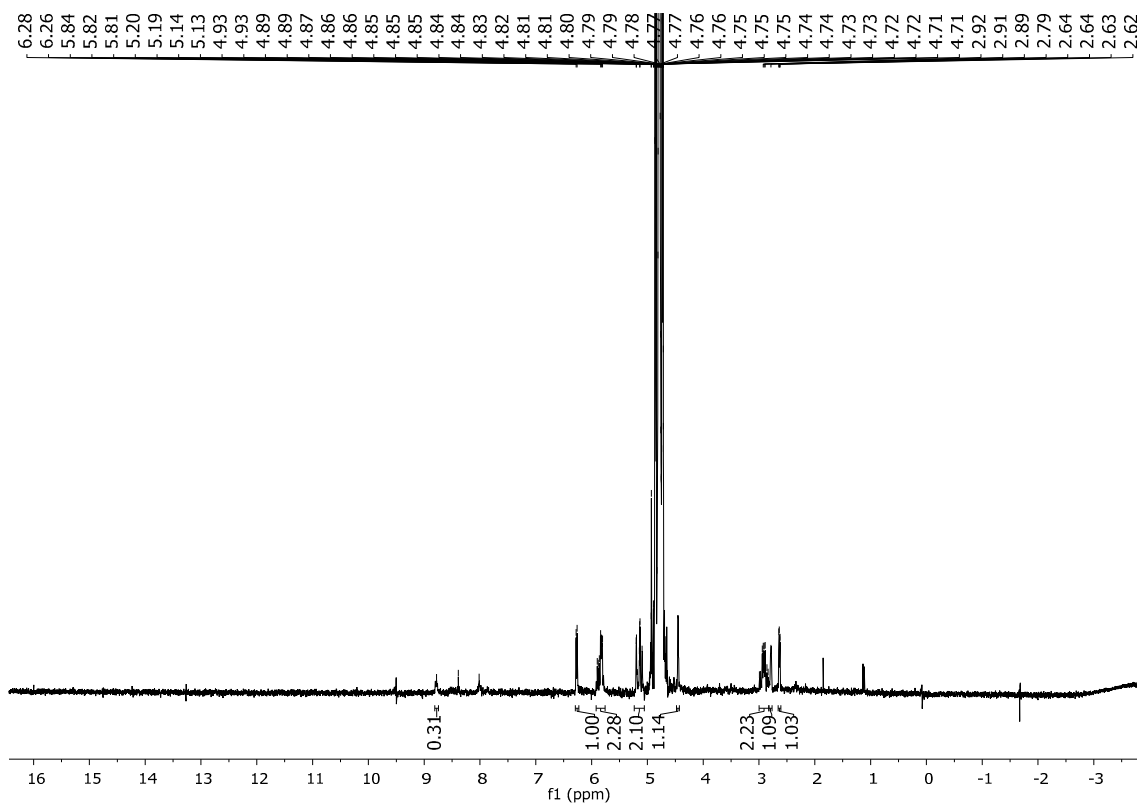

**Figure S18:**  $^1\text{H}$  NMR spectra of photochemical transformation of 1a to 2a under continuous-flow conditions [Flow rate: 0.14 mL/min; rpm: 3.5; Residence time: 3.3 h; Conversion: 93%] on the PTQ6 (Table 2, Entry 3).

### Photochemical transformation of 1a to 2a under continuous-flow conditions.

**Table S8:** Photochemical transformation of 1a to 2a under continuous-flow conditions<sup>1</sup>.

| Entry | Irradiation time (h) | Fraction | Conv. (%) <sup>2</sup> | Cycle | Volume out of the reactor (mL) |
|-------|----------------------|----------|------------------------|-------|--------------------------------|
| 1     | 0 - 4                | 0        | 49                     | 0     | 350                            |
| 2     | 4                    | F1       | 100                    | -     | -                              |
| 3     | 5                    | F2       | 100 <sup>3</sup>       | -     | -                              |
| 4     | 6                    | F3       | 83                     | -     | -                              |
| 5     | 7                    | F4       | 84                     | -     | -                              |
| 6     | 8                    | F5       | 89                     | 1     | 360                            |
| 7     | 9                    | F6       | 92                     | -     | -                              |
| 8     | 10                   | F7       | 88                     | -     | -                              |
| 9     | 11                   | F8       | 75                     | -     | -                              |
| 10    | 13                   | F9       | 54                     | 2     | 450                            |
| 11    | 15                   | F10      | 63                     | -     | -                              |
| 12    | 17                   | F11      | 56                     | -     | -                              |
| 13    | 19                   | F12      | 64                     | 3     | 550                            |
| 14    | 27                   | F13      | 40                     | 4     | 710                            |

<sup>1</sup> Flow rate of 0.12 mL/min (3 rpm), residence time 4 h. <sup>2</sup> Determined by  $^1\text{H}$  NMR. <sup>3</sup>Data not showed

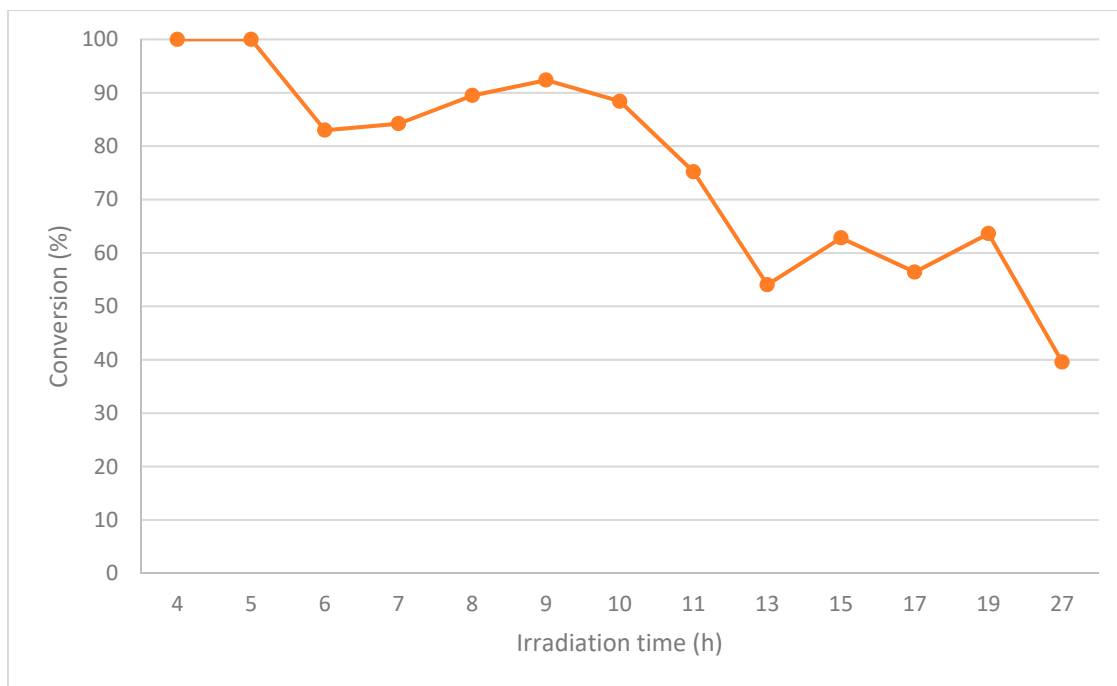

**Figure S19:** Conversion (%) for the continuous-photoflow of **1a** at 20 mM with 4 h of residence time using the PQT6 reactor.

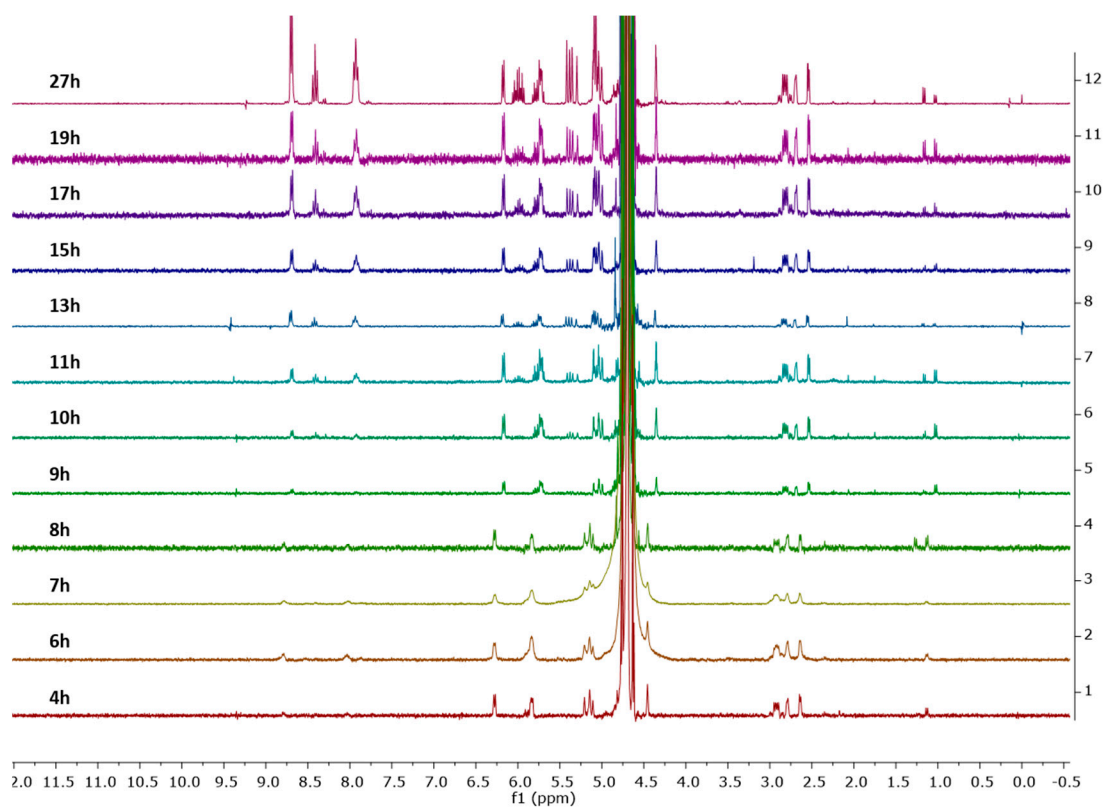

**Figure S20:** Overview of combined  $^1\text{H}$  NMR spectra of photochemical transformation of **1a** to **2a** under continuous-flow conditions [Flow rate: 0.12 mL/min; rpm: 3; Residence time: 4h] on the PTQ6 (Table S8, entries 2-14).

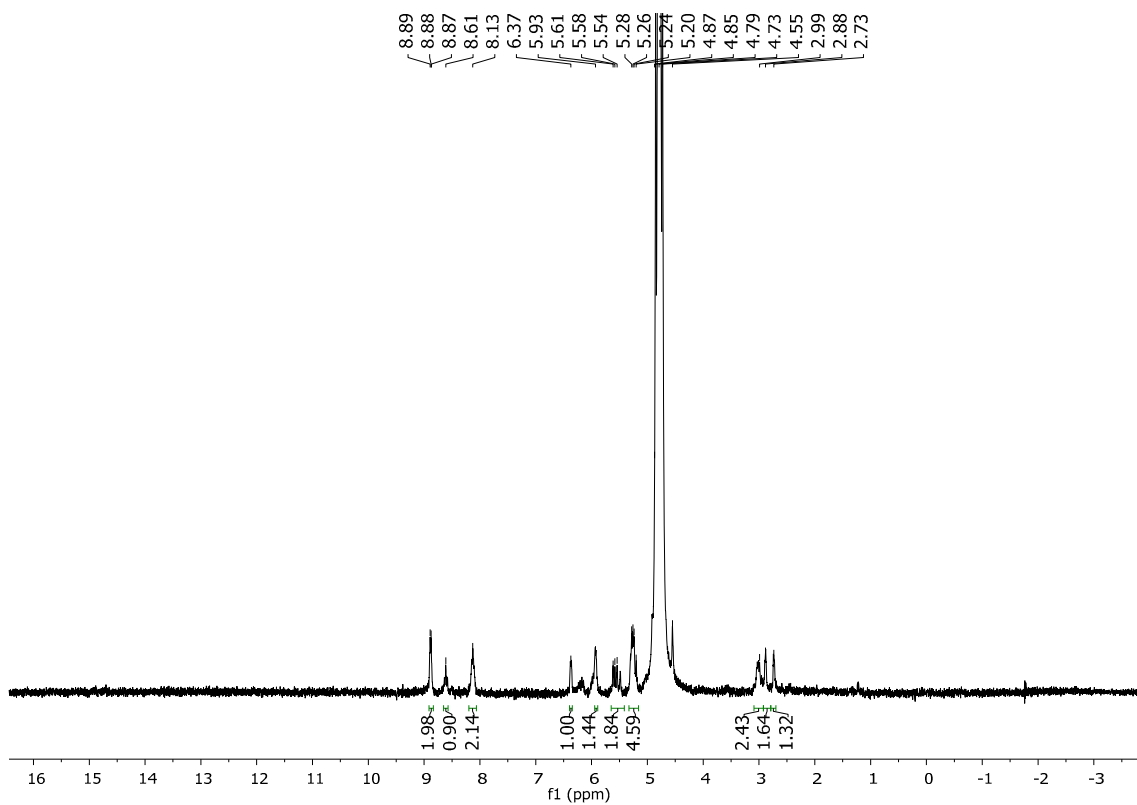

**Figure S21:** <sup>1</sup>H NMR spectra of photochemical transformation of 1a to 2a under continuous-flow conditions [Flow rate: 0.12 mL/min; rpm: 3; Residence time: 4h; Conversion: 49%] on the PTQ6 (Table 3 of the manuscript, Entry 1).

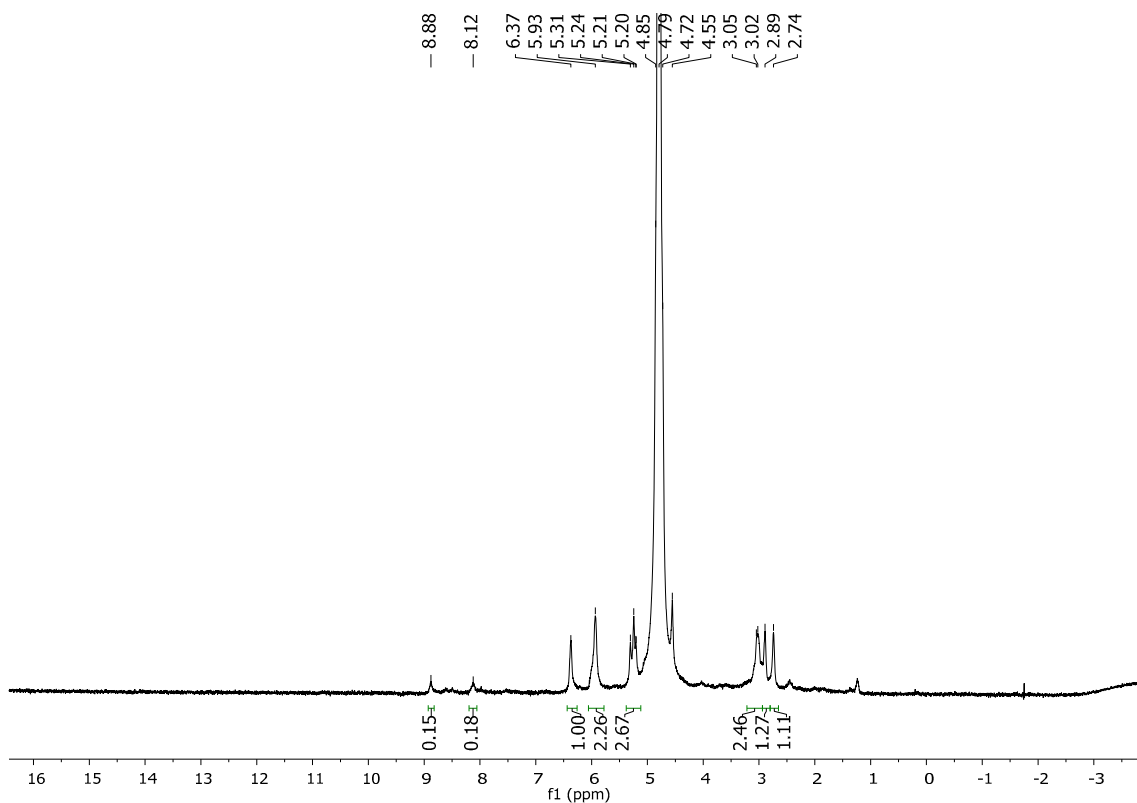

**Figure S22:**  $^1\text{H}$  NMR spectra of photochemical transformation of 1a to 2a under continuous-flow conditions [Flow rate: 0.12 mL/min; rpm: 3; Residence time: 4h; Conversion: 92%] on the PTQ6 (Table 3 of the manuscript, Entry 2)

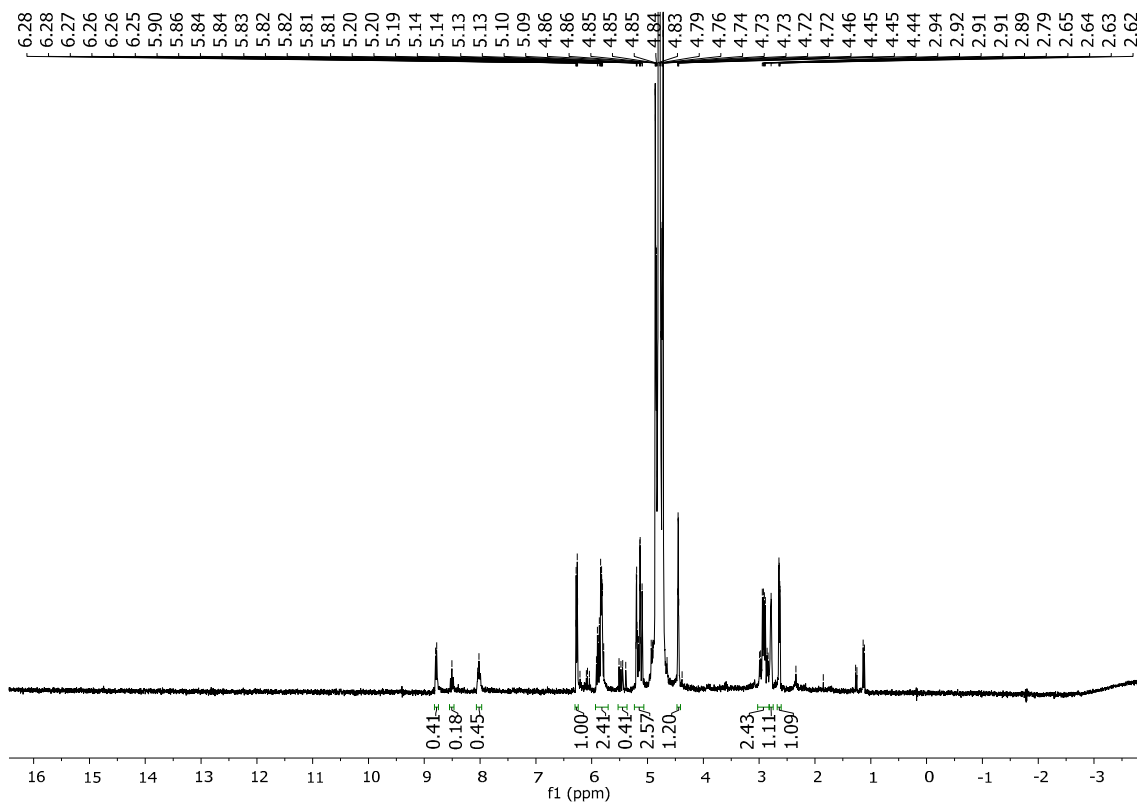

**Figure S23:**  $^1\text{H}$  NMR spectra of photochemical transformation of 1a to 2a under continuous-flow conditions [Flow rate: 0.12 mL/min; rpm: 3; Residence time: 4h; Conversion: 83%] on the PTQ6 (Table 3 of the manuscript, Entry 2)

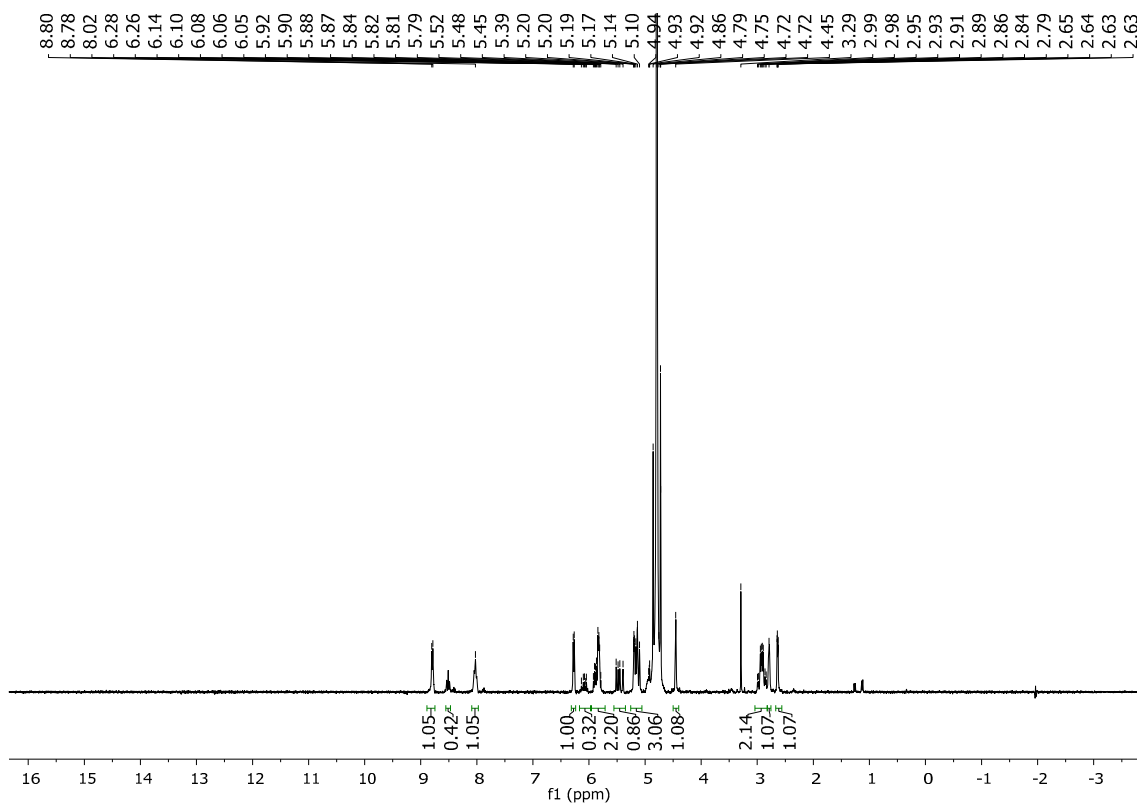

**Figure S24:**  $^1\text{H}$  NMR spectra of photochemical transformation of 1a to 2a under continuous-flow conditions [Flow rate: 0.12 mL/min; rpm: 3; Residence time: 4h; Conversion: 66%] on the PTQ6 (Table 3 of the manuscript, Entry 4)

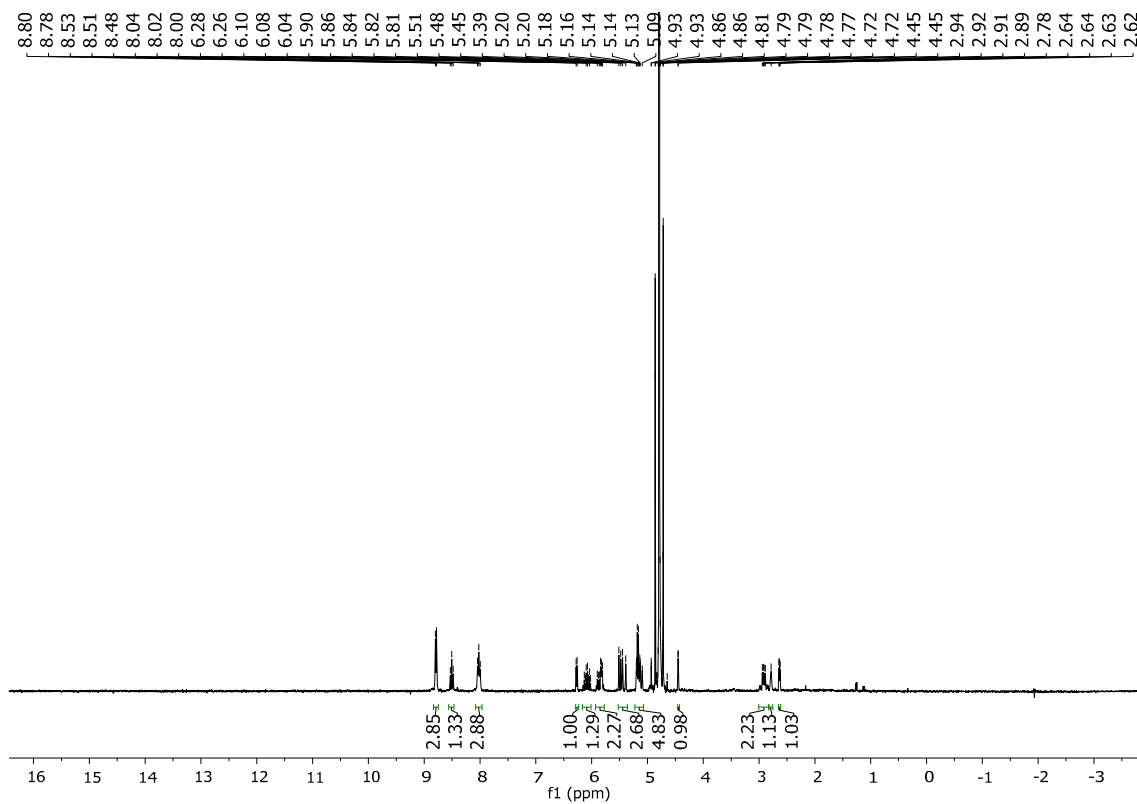

**Figure S25:**  $^1\text{H}$  NMR spectra of photochemical transformation of 1a to 2a under continuous-flow conditions [Flow rate: 0.12 mL/min; rpm: 3; Residence time: 4h; Conversion: 41%] on the PTQ6 (Table 3 of the manuscript, Entry 5)

# <sup>1</sup>H NMR spectra

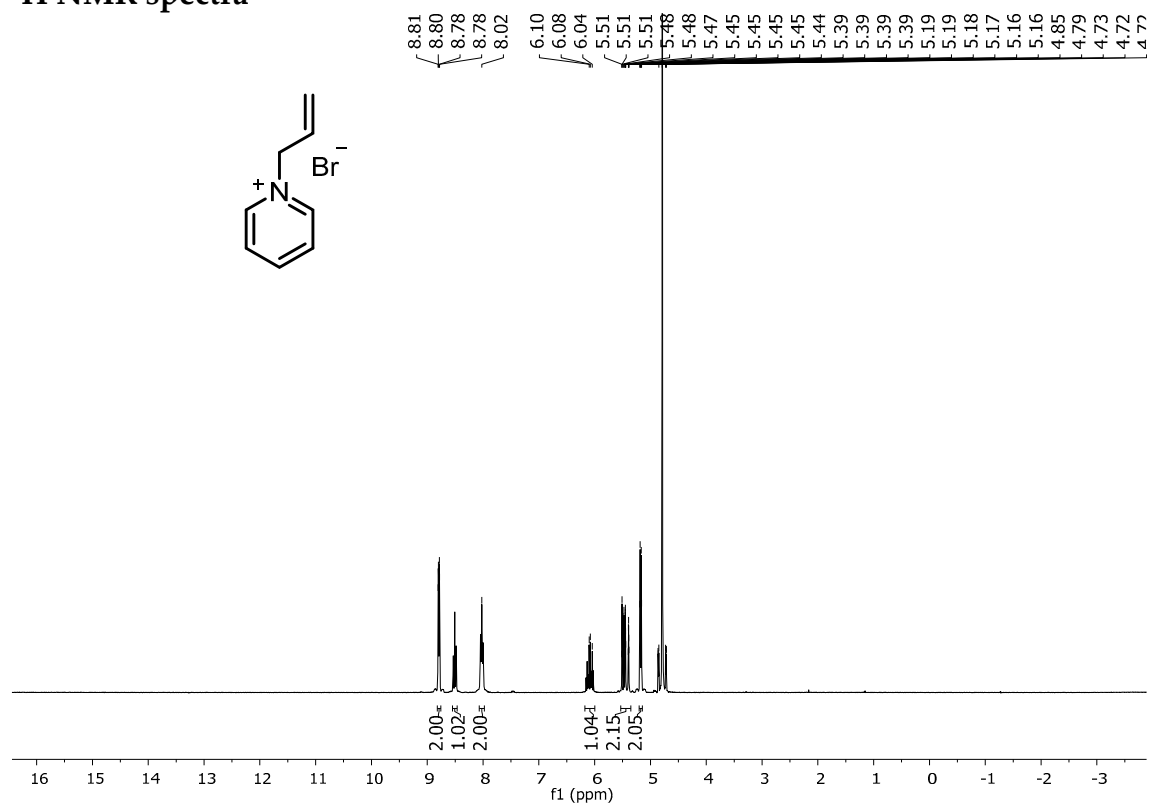

Figure S26: <sup>1</sup>H NMR spectra of 1-allylpyridinium bromide, in accordance with literature [7].

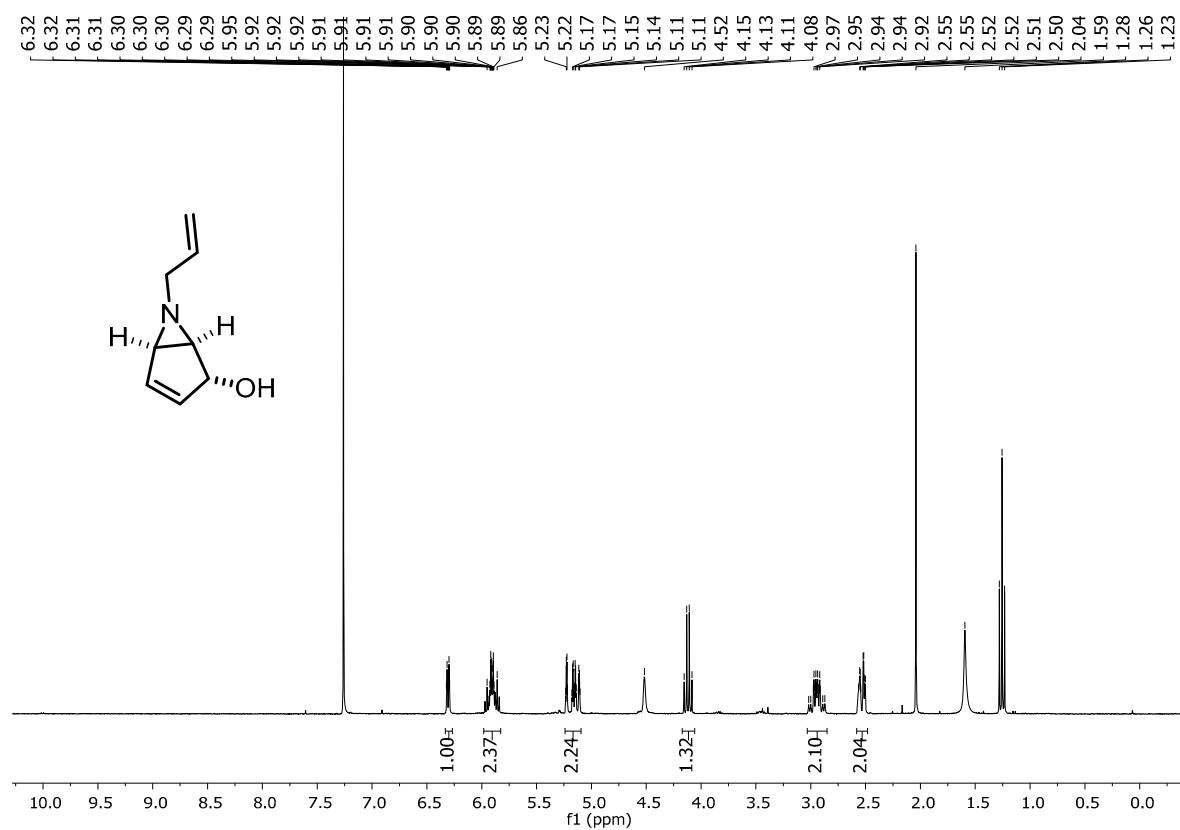

Figure S27: <sup>1</sup>H NMR spectra of 6-allyl-6-azabicyclo[3.1.0]hex-3-en-2-ol, in accordance with literature [7].
